1 **Mitochondrial heteroplasmy is responsible for Atovaquone drug resistance in**  
2 ***Plasmodium falciparum***

3

4

5 Sasha Siegel<sup>1,2</sup>, Andrea Rivero<sup>3</sup>, Swamy R. Adapa<sup>3</sup>, ChengQi Wang<sup>3</sup>, Roman  
6 Manetsch<sup>4</sup>, Rays H.Y. Jiang<sup>3\*</sup> and Dennis E. Kyle<sup>2,3\*</sup>

7

8 Author affiliations

9 <sup>1</sup>Department of Molecular Medicine, College of Medicine, University of South Florida,  
10 Tampa, Florida, USA; <sup>2</sup>Center for Tropical and Emerging Global Diseases, University of  
11 Georgia, Athens, GA, USA; <sup>3</sup>Department of Global Health, College of Public Health,  
12 University of South Florida, Tampa, Florida, USA; <sup>4</sup>College of Science and the Bouvé  
13 College of Health Sciences, Northeastern University, Boston, USA

14

15 **Keywords**

16 Mitochondria, Heteroplasmy, Malaria, Atovaquone, Drug resistance, *Plasmodium*  
17 *falciparum*

18

19 \*Corresponding Authors: Dennis E. Kyle (dennis.kyle@uga.edu) and Rays H.Y.  
20 Jiang(Jiang2@health.usf.edu)

21

22

23

24 **Abstract**

25 Malaria is the most significant parasitic disease affecting humans, with 212  
26 million cases and 429,000 deaths in 2015<sup>1</sup>, and resistance to existing drugs endangers  
27 the global malaria elimination campaign. Atovaquone (ATO) is a safe and potent  
28 antimalarial drug that acts on cytochrome *b* (cyt. *b*) of the mitochondrial electron  
29 transport chain (mtETC) in *Plasmodium falciparum*, yet treatment failures result in  
30 resistance-conferring SNPs in cyt. *b*. Herein we report that rather than the expected *de*  
31 *novo* selection of resistance, previously unknown mitochondrial diversity is the genetic  
32 mechanism responsible for resistance to ATO, and potentially other cyt. *b* targeted  
33 drugs. We found that *P. falciparum* harbors cryptic cyt. *b*. Y268S alleles in the multi-  
34 copy (~22 copies) mitochondrial genome prior to drug treatment, a phenomenon known  
35 as mitochondrial heteroplasmy. Parasites with cryptic Y268S alleles readily evolve into  
36 highly resistant parasites with >95% Y268S copies under *in vitro* ATO selection. Further  
37 we uncovered high mitochondrial diversity in a global collection of 1279 genomes in  
38 which heteroplasmic polymorphisms were >3-fold more prevalent than homoplasmic  
39 SNPs. Moreover, significantly higher mitochondrial genome copy number was found in  
40 Asia (e.g., Cambodia) versus Africa (e.g., Ghana). Similarly, ATO drug selections *in*  
41 *vitro* induced >3-fold mitochondrial copy number increases in ATO resistant lines.  
42 Hidden mitochondrial diversity is a previously unknown mechanism of antimalarial drug  
43 resistance and characterization of mitochondrial heteroplasmy will be of paramount  
44 importance in combatting resistance to antimalarials targeting the electron transport  
45 chain.

46

47 Atovaquone (ATO), a naphthoquinone, and the pyridones<sup>2-4</sup> acridones<sup>5</sup>,  
48 acridinediones<sup>6-8</sup>, tetrahydroacridines<sup>6</sup>, and the 4(1H)-quinolones<sup>9-12</sup> potently inhibit the  
49 cytochrome *bc1* complex of the mitochondrial electron transport chain (mtETC) within  
50 the mitochondria, with disruption of pyrimidine biosynthesis and collapse of  
51 mitochondrial membrane potential leading to parasite death<sup>13</sup>. The first ATO treatment  
52 failures were observed in the Phase II clinical trials between 1991-1994 in Thailand<sup>14</sup>.  
53 These studies demonstrated that ATO monotherapy resulted in clinical treatment  
54 failures and subsequent recrudescence of infection, prompting the use of ATO in  
55 combination with proguanil (AP) for malaria prophylaxis and treatment. The clinical  
56 experience with ATO and numerous *in vitro* drug selection studies led to a hypothesis  
57 that ATO resistance arises readily *de novo* following treatment<sup>15-17</sup>, however *in vitro*  
58 data are incongruent with clinical data of a single Y268S/N/C SNP as the genetic  
59 mechanism in two important aspects. First, clinical treatment failures are most  
60 commonly linked to an amino acid substitution at position Y268 in *cyt. b*<sup>18</sup> but *in vitro*  
61 drug pressure selects for a variety of different mutations except Y268 : M133I, M133V,  
62 P275T, K272R, G280D, L283I, V284K, L144S and F267V<sup>18-20</sup> (Extended Data Table 1).  
63 Second, drug susceptibility studies with ATO resistant Y268S mutants demonstrate a  
64 broad range of potency rather than a dichotomous response that would be expected  
65 from a single SNP. By using paired parasites collected upon patient admission and  
66 subsequent treatment failure from Phase II trials of ATO (Extended Data Table 2), we  
67 discovered three distinct *in vitro* ATO resistance phenotypes (Table 1). A recrudescence  
68 isolate (TM90-C6B) initially typed as Y268 (WT) exhibited low level ATO resistance,  
69 other isolates with Y268S from recrudescence isolates (e.g., TM90-C2B) demonstrated

70 moderate resistance to ATO and myxothiazol, and two isolates from ATO-  
71 pyrimethamine treatment failures showed extreme resistance (TM92-C1086 and TM92-  
72 C1088) (Table 1). Surprisingly, the extreme ATO resistance phenotype produced  
73 greatly reduced susceptibility to a broad range of mtETC inhibitors (Table 1), even  
74 though the parasites expressed the common Y268S/N SNPs and no apparent  
75 resistance-associated SNPs in candidate mtETC encoding genes (Extended Data Table  
76 3). These data demonstrate that more than a single *cyt. b* SNP mediates the different  
77 ATO resistance phenotypes.

78 The mitochondria of asexual erythrocytic stage *P. falciparum* exist as a single  
79 organelle with a linear, non-recombining, tandemly-repeated 6-kb genome with  
80 approximately 22 copies present in each parasite, and is remarkably well-conserved  
81 compared to the nuclear and apicoplast genomes<sup>21</sup>. These data suggest there are  
82 inherent mechanisms in place to conserve the mitochondrial genome that are exclusive  
83 to the mitochondria and its three encoded genes: *cyt. b*, cytochrome c oxidase subunit I  
84 (*cox I*), and cytochrome c oxidase subunit III (*cox III*)<sup>21</sup>. The existence of multiple  
85 mtDNA copies creates the potential for mitochondrial allelic heterogeneity within a  
86 single parasite as well as the mtDNA pool at the population level, a phenomenon known  
87 as mitochondrial heteroplasmy<sup>22</sup>. Therefore, we hypothesized mitochondrial  
88 heteroplasmy as a genetic mechanism for ATO resistance and broader mitochondrial  
89 diversity.

90 If heteroplasmy is a source of mitochondrial diversity, parasites of different  
91 genetic backgrounds could possess variant SNPs at very low levels not detected by  
92 conventional Sanger sequence genotyping methods. To assess presence of

93 heteroplasmic SNPs that confer ATO resistance, we used a pyrosequencing assay for  
94 quantitative analysis of cyt. *b*<sup>23</sup> to quantify the Y268S allele (Figure 1A) and applied it to  
95 the earliest cryopreserved *P. falciparum* isolates from the Phase II studies (Extended  
96 Data Table 1). These data indicate the presence of cryptic mutant alleles present in  
97 admission parasite isolates (e.g., TM90-C2A and TM90-C40B2), with ~1-2% mutant  
98 Y268S frequency detected (Figure 1B). Similarly, ATO resistant isolates (e.g., TM90-  
99 C2B and TM90-C50B5) from clinical failures possessed extremely high copies of  
100 Y268S. The TM90-C6B isolate had low-level Y268S presence (Figure 1B); interestingly  
101 this isolate was from a clinical failure initially identified as WT Y268 cyt. *b* (Extended  
102 Data Table 1). In contrast, no Y268S heteroplasmy was found in *P. falciparum* clones  
103 unable to develop ATO resistance (e.g., D6)<sup>24</sup> or found to develop alternative  
104 cytochrome *b* mutations (e.g., W2; Extended Data Table 2),<sup>18,20</sup> confirming that the  
105 observed Y268S allele is only present at low levels in some parasite mitochondrial  
106 haplotypes.

107 To independently investigate the novel parasite heteroplasmy genetics, we next  
108 studied the same set of isolates by Illumina sequencing with very deep coverage  
109 (10,000-30,000x coverage of mtDNA) and determined the Y268S allele frequency (AF)  
110 (Figure 2A). These data confirmed the presence of low-level Y268S heteroplasmy in *P.*  
111 *falciparum* isolates prior to treatment and in a 2008 isolate from Cambodia (PL08-025).  
112 The deep sequencing data for recrudescence ATO resistant isolates were consistent with  
113 the pyrosequencing analysis, demonstrating very high, yet not purifying levels of Y268S  
114 selection in the mtDNA. Interestingly, ATO resistant TM93-C1090 possessed low-level  
115 Y268S although the majority of mitochondrial alleles were Y268N. The corresponding

116 admission isolate for this parasite (TM93-C0151) only showed low-level Y268S. It is  
117 plausible that this isolate had *de novo* selection of Y268N or possessed undetectable  
118 Y268N (< 0.5% AF) pre-treatment.

119 Overall, these findings sharply contrast with previous reports of *de novo* Y268S  
120 mutant selection in patients treated with ATO, since Y268S heteroplasmy demonstrates  
121 mutant alleles already were present in admission isolates prior to ATO exposure, but it  
122 required very high coverage, PCR-free Illumina sequencing of the mtDNA to uncover  
123 these low level heteroplasmic alleles. Therefore, we next aimed to experimentally  
124 demonstrate the potential for ATO resistance to result from low-level Y268S  
125 heteroplasmy *in vitro*, which to our knowledge, has never been successfully generated  
126 in prior studies. We selected for resistance to ATO in *P. falciparum* clones isolated from  
127 patients prior to ATO treatment (TM90-C2A and TM90-C40B2) and a 2008 clone from  
128 Cambodia (ARC08-88-8A; Figure 1C); each of these expressed low level Y268S  
129 heteroplasmy in pyrosequencing and deep sequencing analysis. Parasites were seeded  
130 at  $10^8$  per flask and exposed to 10x  $EC_{50}$  concentrations of ATO, and within 15-27 days  
131 all generated resistance with cyt. *b* Y268S mutations (Figures 1C and 2A). We then  
132 investigated if the Y268S mutation could be induced by another cyt. *b* acting drug,  
133 menoctone (MEN), a 2-hydroxy-3-(8-cyclohexyloctyl)-1,-4-naphthoquinone thought to  
134 have the same mechanism of action as ATO<sup>25</sup>. MEN at 10x  $EC_{50}$  (1.5  $\mu$ M) selected for  
135 Y268S in TM90-C2A, but W2 developed the common M133I mutation associated with  
136 ATO exposure in other lab strains (Extended Data Figure 3)<sup>18,20,26</sup>. High coverage  
137 deep-sequencing results confirmed 99% Y268S and M133I frequencies in these drug  
138 selected mutants (Figure 2A). The MEN resistance phenotype of C2A+10xMEN-1A

139 displayed high-grade ATO resistance with an  $EC_{50}$  of 54  $\mu$ M, similar to that of TM92-  
140 C1086. Conversely, W2+10xMEN-1A expressed moderate resistance ( $EC_{50}$  = 66 nM),  
141 presumably reflective of fitness differences between cyt. *b* Y268S and M133I. These  
142 data are consistent with other M133I selected mutants<sup>18</sup> (Extended Data Table 2).  
143 Obtaining the clinically relevant Y268S mutation in an *in vitro* setting using multiple  
144 drugs shows that pre-existing, low-level heteroplasmic SNPs are responsible for the  
145 development of resistance in these parasites.

146 *P. falciparum* dihydroorotate dehydrogenase (DHODH) is the only essential  
147 enzyme in the mtETC that is required to synthesize pyrimidine precursors, and we  
148 hypothesized that parasites with resistance to both DHOD and cyt. *b* inhibitors could  
149 recapitulate the extreme resistance phenotype. DSM1, a potent inhibitor of DHODH,  
150 induces mutations in DHODH as well as increased copies of the DHODH gene<sup>19,27</sup>.  
151 Unsurprisingly, 10x  $EC_{50}$  DSM1 pressure in the ATO sensitive TM90-C2A background  
152 readily generated DSM1 resistant parasites with copy number amplification in DHODH  
153 (Extended Data Table 4). However, there were two unusual selections in this  
154 background, with C2A+10xDSM-2B being a mixed genotype of 30% Y268S and 8%  
155 Y268N, a tri-allelic heteroplasmic parasite being selected by DSM1 alone (Figure 2A). In  
156 addition, this parasite was a partial R265G mutant in DHODH (34%); this mutation was  
157 only observed in one other DSM1 selected parasite from TM90-C2A (C2A+10xDSM1-  
158 3B), that was predominantly an R265G mutant (97%). This raises the possibility that  
159 DSM1 exposure can induce increased heteroplasmy in cyt. *b*., although in an unstable  
160 and inefficient manner.

161 *In vitro* DSM1 drug resistance selection studies in an ATO resistant background

162 yielded intriguing results on the role of heteroplasmy and mitochondrial copy number.  
163 DSM1 drug selections with ATO resistant TM90-C2B were not successful at 10x EC<sub>50</sub>  
164 (1.5  $\mu$ M) concentrations, with three failed attempts (Extended Data Figure 4). Using  
165 lower DSM1 concentrations (2x EC<sub>50</sub> = 300 nM) made resistance development possible.  
166 Deep-sequencing of C2B+10xDSM1 selected lines (Figure 2A) revealed that parasites  
167 thawed from earliest cryopreserved line and expanded for sequencing (45 days of total  
168 DSM1 exposure) largely lost their initial resistance to ATO during DSM1 exposure, with  
169 parasites gradually exchanging their Y268S allele in favor of copy number amplifications  
170 in DHODH, implying that these resistance mechanisms are antagonistic at low  
171 concentrations of DSM1, but completely incompatible at high concentrations. The initial  
172 ability to survive both DSM1 and atovaquone pressure could consist of immediate  
173 reactions to respirational stress, where DSM1 induces DHODH amplifications quickly  
174 and proportionately to DSM1 exposure, and Y268S is cryptically present and able to  
175 increase allele numbers at any time. Both of these mechanisms are attractive from the  
176 metabolic standpoint in that they are readily adaptable and can be appropriately tuned  
177 for maximum fitness. Similarly, the increased mitochondrial copy number observed with  
178 some selections (e.g, ARC08-88; Figure 2C) could contribute to an enhanced stress  
179 response and high-grade resistance phenotype. The initial phenotypic response and  
180 resultant fading high-grade ATO/DSM1 resistance seen in ATO, MEN, and DSM1  
181 selections can all be attributed to a combination of these genetic plasticity features,  
182 leading to metabolic plasticity with clear advantages for the parasite.

183 We next sought to estimate the worldwide frequency and distribution of  
184 mitochondrial heteroplasmy. We analyzed the publicly available *P. falciparum* data from



185 the MalariaGEN Pf3k project ([www.malariagen.net/pf3k](http://www.malariagen.net/pf3k))<sup>28</sup> to uncover heteroplasmic  
186 mitochondrial diversity globally. After removing samples of multiple infections, lab lines,  
187 duplicates, and progenies of genetic crosses, we calculated the copy number of  
188 mitochondria number  $\hat{C}$  of 1279 genomes using the sequencing depth differences  
189 between nuclear genome and mitochondrial genomes, with sampling-computation  
190 based correction of the sequencing coverage bias impacted by GC content<sup>29</sup>. For  
191 validation of our method, we estimated the copy number of nuclear chromosome as  
192 controls; and obtained the median copy number value of 1.00 (Figure 2B), consistent  
193 with the haploid genome of *P. falciparum*<sup>30</sup>. In contrast, the median of mitochondrial  
194 copy number was 21.75 (Figure 2B). The majority of mitochondrial copy numbers from  
195 different samples ranged from 10 to 30, suggesting significant copy number variation in  
196 mitochondria globally (F-test p-value < 2.2e-16). The results are in agreement with  
197 recent reports of qPCR experiments<sup>31</sup> which only used *cytochrome b* to estimate copy  
198 number.

199 To further quantify the level of heteroplasmy in parasite populations, a statistical  
200 measurement of maximum likelihood (PL score) of SNP detection based on VCF  
201 (Variant Call Format) output in the GATK pipeline<sup>32</sup> (Figure 3A) was developed to detect  
202 allele frequency (AF). The lower AF value indicates lower levels of heteroplasmy, while  
203 AF = 1 indicates homoplasmy, either wild type or mutant. We scanned 1279  
204 polymorphic isolates and observed heteroplasmy in the majority of polymorphic sites (n  
205 =1033, coverage > 200x) (Figure 3A & D). Our results showed that *P. falciparum* mt-  
206 diversity is currently underestimated by at least 3-fold (Poisson distributions, p < 0.001)  
207 without taking heteroplasmy into account. Geographically-specific polymorphisms exist

208 in both homoplasmic and heteroplasmic SNPs (Figure 3B), suggesting important  
209 phenotypes might be associated with heteroplasmy. Interestingly, Cambodian *P.*  
210 *falciparum* isolates had a much higher rate of heteroplasmic SNPs than isolates from  
211 Ghana (Figure 3B). In addition, the mitochondrial copy number varied geographically  
212 with the highest copy numbers found in SE Asia where antimalarial drug resistance  
213 repeatedly emerges (Figure 3C). In agreement with widespread heteroplasmy in the  
214 global population, our study of deep-sequencing Asian parasite collections also  
215 revealed heteroplasmy, with Y268S as a low frequency common allele (Figure 2A &  
216 3E).

217 Finally, to provide physical evidence of Y268S heteroplasmy, we performed  
218 single molecule sequencing with Nanopore<sup>33</sup> on mtDNA of TM90-C2B. We obtained  
219 >500x coverage of mitochondrial genome and longest reads of >20 kb (Figures 3F and  
220 3G). The single molecule sequencing resulted in the same levels of allele count with  
221 NGS sequencing with 90% Y268S in both systems (Figure 3H). Single reads consisting  
222 of both Y268S and references alleles were detected, thus supporting the heteroplasmy  
223 genetics of ATO resistance and mitochondrial diversity (Figure 3H).

224 Mitochondrial function in *P. falciparum* changes as the parasite transitions from  
225 asexual erythrocytic stages into gametocytes that are infectious to mosquitos. The  
226 increase in aerobic respiration is thought to block the transmission of *cyt. b* SNPs  
227 associated with ATO resistance<sup>34</sup>, although other studies demonstrated successful  
228 transmission of *cyt. b* M133I mutants<sup>25</sup>. Regardless, our data suggest heteroplasmy is  
229 transmitted and maintained as shown in the population diversity data, since both  
230 homoplasmic and heteroplasmic SNPs could be seen circulating in local populations

231 (Figure 3B). Conceivably, heteroplasmy allows both neutral polymorphisms and alleles  
232 with fitness costs to be maintained at low frequencies and successfully transmitted.  
233 Additional fitness studies are required to further assess the transmission potential of the  
234 Y268S mutants with high copies of the mutant allele. The mechanism by which low-level  
235 diversity is maintained in organisms with similar mt-DNA structure/replication strategies  
236 has been studied extensively and is known as substoichiometric shifting. In plants,  
237 substoichiometric shifting produces unique subgenomic mitochondrial DNA molecules  
238 as the result of a recombination-based replication strategy, and can confer fitness  
239 advantages. It is unknown whether substoichiometric shifting can explain the  
240 maintenance of subgenomic mtDNA variants in *Plasmodium*, but it warrants further  
241 investigation.

242 In this study we provide multiple lines of evidence that mitochondrial  
243 heteroplasmy is the genetic mechanism underlying ATO resistance. These include *in*  
244 *vitro* drug selection, ATO resistance phenotype analysis, clinical isolate  
245 characterization, pyrosequencing analysis, mitochondrial copy number, and single  
246 molecule sequencing. Although current polymorphism studies represent a conservative  
247 estimate of heteroplasmy and mitochondrial copy numbers, our population analysis  
248 shows intriguing mitochondrial diversity exists in SE Asia, where resistance first  
249 emerged for many antimalarial drugs. Furthermore, increased mitochondrial copy  
250 number was observed in the same region, and also in parasites exposed to drug  
251 selection pressure *in vitro*. Our study revealed two novel aspects of malarial parasite  
252 mitochondrial genetics, i.e, heteroplasmy and copy number variations related to ATO  
253 resistance; these results will be crucial for developing other mitochondrial-targeting

254 drugs, as well as combating drug resistance for eventual malaria elimination.

255

## 256 **Materials and Methods**

### 257 **Parasite lines and cell culture.**

258 Admission and recrudescence parasite samples were collected from patients in the

259 Phase II clinical trials upon admittance for treatment, and following failure of the

260 treatment regimen (various dose regimens of atovaquone monotherapy or

261 atovaquone/pyrimethamine combination therapy)<sup>14</sup>. The parasite history for paired

262 admission and recrudescence isolates are outlined in Supplemental Table 1. Parasites

263 were adapted to *in vitro* culturing and maintained according to the methods previously

264 described by Trager and Jensen, with modifications first described by Webster *et al.*<sup>35,36</sup>

265 Parasites were maintained at 2% hematocrit in human O+ erythrocytes in RPMI 1640

266 (Invitrogen) medium containing 25 mM HEPES, 28 mM NaHCO<sub>3</sub>, 10% human type A

267 positive plasma and incubated at 37°C in 5% O<sub>2</sub>, 5% CO<sub>2</sub>, and 90% N<sub>2</sub> atmospheric

268 conditions. Cultures were sustained with media changes three times per week and kept

269 below 5% parasitemia with sub-culturing.

### 270 **Drugs and chemicals.**

271 Atovaquone (ATOV; 2-hydroxynaphthoquinone), was purchased from Sigma (St. Louis,

272 MO). Menoctone was synthesized and purified by the Manetsch laboratory at the

273 University of South Florida, Department of Chemistry. DSM1 was kindly provided by

274 Pradipsinh Rathod at the University of Washington. All compounds were used following

275 dissolution in DMSO with final solvent concentrations less than 0.5%.

### 276 **Parasite EC<sub>50</sub> determinations with hypoxanthine [<sup>3</sup>H] incorporation assay.**

277 The methods used were performed as described previously<sup>24</sup>, with a modification of a  
278 72-hour incubation period.

279 **Selection of atovaquone or menoctone resistant parasites *in vitro*.**

280 In order to evaluate whether the genetic cryptic heteroplasmy background of parasite  
281 strains is essential to the development of the Y268S mutation conferring atovaquone  
282 resistance, we assessed the resistance potential of admission isolate clones TM90-  
283 C2A-F6, TM90-C40B2, and ARC08-88-8A. TM90-C2A and TM90-C40 were taken from  
284 patients prior to treatment and later recrudesced with Y268S mutations in *cyt. b*  
285 following atovaquone monotherapy regimens (Supplementary Table 1). TM90-C2A,  
286 TM90-C40, and ARC08-88 were sub-cloned by limiting dilution<sup>37</sup> prior to any drug  
287 selections, and sub-clones TM90-C2A-F6, TM90-C40B2, and ARC08-88-8A were used  
288 for all drug selections. Sub-cloning the parasites prior to drug selections was necessary  
289 in order to provide an isogenic background as well as to maximize phenotypic stability,  
290 as many of these parasites experienced more widely fluctuating EC<sub>50</sub> values to  
291 mitochondrial inhibitors (4-8 fold) than control parasites ( > 3 fold). We hypothesize the  
292 phenotypic fluctuations are a function of the genotypic plasticity within the population as  
293 a whole, where successive replication rounds vary somewhat in Y268S frequency.  
294 ARC08-88 was originally obtained from the World Health Organization Global Plan  
295 Artemisinin Resistance Containment consortium, and was used to demonstrate the  
296 development of atovaquone resistance from a parasite outside the Phase II studies of  
297 atovaquone in Thailand that had cryptic Y268S heteroplasmy. TM90-C2A, TM90-  
298 C40B2, and ARC08-88-8A were grown from earliest available cryopreserves to 10<sup>8</sup> and  
299 seeded into 25 ml flasks in triplicate. The complete medium contained approximately

300 10x EC<sub>50</sub> atovaquone (10 nM) or 10x EC<sub>50</sub> mefloquine (1.5 μM) with media changed  
301 twice per week, and split 1:2 with fresh erythrocytes every 10 days to maintain 2%  
302 hematocrit. Parasites were considered “recovered” from drug selection when parasite  
303 densities reached 2% parasitemia and sustained growth under continuous drug  
304 pressure. All parasites had the cytochrome *b* gene sequenced to look for possible  
305 mutations developed during drug pressure.

306

### 307 **Parasite genomic DNA isolation.**

308 *P. falciparum*-infected erythrocytes were treated with 0.05% saponin for 10 min and  
309 genomic DNA (gDNA) was extracted with the Qiagen DNeasy Kit according to  
310 manufacturer’s protocols. Unless described otherwise, gDNA was harvested from  
311 parasites from earliest possible cryopreservation dates to best preserve phenotypes  
312 and genotypes.

### 313 **PCR and cytochrome *b* and DHODH gene sequencing.**

314 All *P. falciparum* cytochrome *b* PCR products were amplified using primers cytbFOR  
315 5’—TGCCTAGACGTATTCCTG—3’ and cytbREV 5’—GAAGCATCCATCTACAGC—3’.  
316 PCRs were amplified using Phusion HS II High-Fidelity PCR Master Mix (ThermoFisher  
317 Scientific) with ~20 ng parasite gDNA template, according to manufacturer’s instructions  
318 with the following program: 98°C—30s initial denaturation step, then 35 cycles: (98°C—  
319 10s, 54°C—40s, 72°C—30s) and a final extension of 72°C for 7 min. PCR products  
320 were confirmed as a single, discrete band of 1,382 bp length on a 1% agarose gel then  
321 subsequently purified using the Qiagen PCR Purification Kit according to manufacturer’s  
322 instructions. Purified PCR products were prepared for Sanger sequencing service at

323 Genewiz (Genewiz, South Plainfield, NJ) using the following sequencing primers: pf-  
324 cytb-SEQFOR1: 5'—GTGGAGGATATACTGTGAGTG—3', pf-cytb-SEQFOR2: 5'—  
325 TACAGCTCCCAAGCAAAC—3', pf-cytb-SEQREV1: 5'—  
326 GACATAACCAACGAAAGCAG—3', and pf-cytb-SEQREV2: 5'—  
327 GTTCCGCTCAATACTCAG—3'. The *dhodh* gene was sequenced similarly using  
328 primers described in Ross *et al*<sup>19</sup>. Sample sequences were analyzed and aligned using  
329 ApE (A Plasmid Editor) software, and mapped to the *Pf*-3D7 *cytochrome b* gene  
330 annotated on Plasmodb.org for mutation detection.

331 **Sequencing to identify SNPs in mitochondrial genes.** We sequenced multiple  
332 candidate genes in the mtETC to determine if additional SNPs were associated with the  
333 drug resistance spectrum phenotypes. All PCR reactions were set up similarly to the  
334 sequencing of the *cytochrome b* gene above. Candidate genes included  
335 PF3D7\_0915000 (NDH2), PF3D7\_0603300 (DHODH), PF3D7\_0523100 (Core 1),  
336 PF3D7\_093360 (Core 2), PF3D7\_1462700 (*cyt. c<sub>1</sub>*), PF3D7\_1439400 (Rieske),  
337 PF3D7\_1426900 (QCR6), PF3D7\_1012300 (QCR7), and the three mt-encoded genes:  
338 MAL\_MITO\_3 (*cyt. b*), MAL\_MITO\_1 (*coxIII*), MAL\_MITO\_2 (*coxI*). For the primers in  
339 Extended Data Table 5, those labeled PCR FOR and PCR REV were used in PCR  
340 amplifications, and SEQ PR denotes primers used to sequence the amplification in its  
341 entirety.

#### 342 **Pyrosequencing of Y268S allele.**

343 The Pyromark Q96 ID system was used for the detection of single-nucleotide  
344 polymorphism (SNP) for Y268S detection in *Pf*-*cytochrome b*, with Qiagen Pyromark  
345 Gold Q96 reagents and buffers along with streptavidin sepharose beads (GE

346 Healthcare). All template and reaction components were prepared according to  
347 manufacturer's protocols. Pyrosequencing primers were designed using Pyromark  
348 Assay Design Software. Primers for the initial PCR reaction were amplified with  
349 PFcytb\_pyro\_Biotin\_FOR 5'—Biotin-ACCATGGGGTCAAATGAGTTAT—3' and  
350 PFcytb\_pyro\_REV 5'—AGCTGGTTTACTTGGAACAGTTTT—3' as 50 µL reactions with  
351 25 µL 2X Phusion Hot Start II HF PCR Master Mix, 0.2 µM primer concentrations, ~10-  
352 50 ng template gDNA, brought to 50 µL total volume with nuclease-free water, with the  
353 following thermocycling conditions: initial denaturation of 98°C for 30s, 55 cycles of  
354 98°C for 30s, 53°C for 5s, and 72°C for 8s. All parasites resulting from *in vitro* drug  
355 selections had gDNA harvested immediately following parasite recovery to 2%  
356 parasitemia, which provided insight into the early period of resistance where more  
357 extreme phenotypes were observed in EC<sub>50</sub>. Subsequent PCRs were run on 1.5%  
358 agarose gels to confirm a single discrete band without excess primer present, as  
359 unconsumed primer has been shown to interact with pyrosequencing primers to  
360 contribute to a background signal in no template controls, and was minimized by using  
361 low primer concentrations and using a high cycle number to exhaust primers. The  
362 Pyromark pyrosequencing assay was performed according to manufacturer's protocols  
363 with pyrosequencing primer PFcytb\_seq\_assay\_REV 5'—  
364 TGGAACAGTTTTTAACATTG—3'. Each parasite gDNA sample was initially amplified  
365 independently in triplicate, and had two technical replicates per reaction (25 µL PCR per  
366 pyrosequencing reaction) on the Pyromark Q96 ID for a total of at least 6  
367 pyrosequencing runs per parasite gDNA template. Allele frequencies were analyzed by  
368 Pyromark ID software in allele quantification mode.



369 **Pyrosequencing Y268S assay standard curve.** Since all Y268S mutant genotypes  
370 still contained some small quantities of wild-type allele, we chose to use the parasite  
371 with the highest percentage Y268S mutant, TM90-C50B5 gDNA (99.52% mutant) and  
372 D6 (0% mutant) were mixed at 10% increments from 0% wild type gDNA + 100% wild  
373 type gDNA, adding in additional increment mixtures at the lower 5% and upper 95%,  
374 with 1% increments to look at the sensitivity of detection. These ratio wild type:mutant  
375 gDNA mixtures were made independently three times and then used in subsequent  
376 PCR reactions and pyrosequencing reactions to generate the standard curve in Figure  
377 1A.

378 **DHODH Copy Number Variation Quantitative PCR (qPCR).** *Pf*-DHODH copy number  
379 was determined using the DHODH qPCR primers previously described by Guler *et al.*<sup>27</sup>  
380 and the LDH-T1 FOR/REV control primers from Chavchich *et al.*<sup>38</sup> using Brilliant II/III  
381 SYBR Green Master Mix with ROX and the Mx3005P qPCR machine (Applied  
382 Biosystems). The relative copy number of DHODH was determined for 0.1 ng of gDNA  
383 and normalized to the LDH gene using the  $\Delta\Delta C_T$  method<sup>39</sup>.

384 **Deep sequencing analysis and data mining.** For deep sequencing of clinical and *in*  
385 *vitro* selected parasite genomes, we ran samples on the Illumina HiSeq 3000 with the  
386 150 cycle protocol (PCR-free) and used >1 ug purified DNA as starting material, and  
387 reached 10,000–30,000 x coverage of mtDNA. Each allele must have a minimum of 100  
388 high quality reads (QC score > 60) mapped to the loci to be identified as a rare allele.  
389 As controls, we examined all loci with the same stringency, and our method did not  
390 recover any low frequency heteroplasmy in the vast majority of the loci (n=5954), other  
391 than a few loci including Y268S.

392 For computational mining of the sites with heteroplasmy in the global parasite  
393 populations, we developed a maximum likelihood based method to differentiate high  
394 confidence heteroplasmic sites from background error count. We use a statistical  
395 measurement of maximum likelihood (PL score) of SNP detection based on VCF  
396 (variant call format) output in GATK pipeline<sup>32</sup> to detect allele frequency (AF). First, we  
397 obtained the genotype likelihood (GL) for the given loci, with GL defined as LOG10  
398 scaled likelihoods for all possible genotypes given the set of alleles defined in the REF  
399 and ALT fields, as specified by GATK protocols<sup>40,41</sup>. Then, the phred-scaled genotype  
400 likelihood (PL) score is obtained. Only the PL score of being heteroplasmic vs being  
401 homoplasmic, at a given locus, larger than 6 (i.e, Pvalue < 0.000001), is considered a  
402 true heteroplasmic site. The lower AF value indicates lower level of heteroplasmy, while  
403 AF = 1 indicates homoplasmy, either wild type or mutants.

404 To independently confirm our computational mining methods, we examined 100  
405 isolates from the population data sets. We retrieved the raw data mitochondrial BAM  
406 files, and examined that the heteroplasmic sites are correctly identified by the maximum  
407 likelihood method, as shown by more than a hundred high quality reads in the mapping  
408 alignments.

409 We used the sequencing depth differences to estimate the copy number of query  
410 chromosome from sequencing signal. Here, we assume the PCR amplification level is  
411 same for each chromosome copy. It has been reported the copy number of nuclear  
412 chromosome is 1 during asexual stage in *Plasmodium*<sup>30</sup>. Therefore, the sequencing  
413 depth difference between input and reference nuclear chromosome is the estimated  
414 copy number of query chromosome (equation 1).

$$415 \quad \widehat{C}_{query} = \frac{\widehat{r}_{query}}{\widehat{r}_{nuclear}} \quad (1)$$

416 where  $\widehat{C}$  is the estimated copy number and  $\widehat{r}$  is the estimated sequencing signal. To  
417 find the best estimation of sequencing signal, we assume that the true sequencing  
418 reads signal of a whole specific chromosome follows a uniform distribution. Then we  
419 calculated the optimal sequencing depth with

$$420 \quad \widehat{r} = \arg \min \sum_{i=1}^n (\widehat{r} - r_i)^2$$

421 (2)

422 Here,  $i(n = \sum i)$  is a given segment on the chromosome; and the sequencing signal  $r_i$  is  
423 calculated as

$$424 \quad r_i = \frac{R_i}{L_i} \quad (3)$$

425 where  $R_i$  is the total reads mapped on segment  $i$ ,  $L_i$  is the segment length. The final  
426 estimation  $\widehat{r}$  from equation 2 is

$$427 \quad \widehat{r} = \frac{\sum_{i=1}^n r_i}{n}$$

## 428 **Nanopore mtDNA sequencing.**

429 Isolation of mitochondrial DNA in TM90-C2B

430 Parasites were grown to 10% parasitemia in 50 mL culture volume, then  
431 synchronized with 5% sorbitol twice, spaced 4 hours apart, followed by MACS column  
432 purification to remove any residual trophozoites and schizonts so that only ring stages  
433 were collected to obtain non-replicative mtDNA molecule forms only. Red blood cells

434 were then lysed using 0.1% saponin in 1x PBS, washed 3x in PBS, and mitochondrial  
435 DNA was isolated from parasite material using the Abcam Mitochondrial DNA Isolation  
436 Kit using the manufacturer's instructions, with the exception of using needle passage to  
437 homogenize cells. Isolated mitochondrial DNA was used for subsequent Nanopore  
438 library preparation and sequencing.

#### 439 Library Preparation and Sequencing

440 1 µg of parasite mitochondrial DNA (RNase treated) was subsequently treated  
441 with protease and mtDNA eluted in 45 µl nuclease-free water (NFW). End-repair and  
442 dA-tail of mtDNA was performed by adding 7 µl Ultra II End-Prep buffer, 3 µl Ultra II  
443 End-Prep enzyme mix (NEBNext Ultra II End-Repair/dA-tailing Module, New England  
444 BioLabs), and 5 µl NFW. The mix was incubated for 5 minutes at 20 °C and 5 minutes  
445 at 65 °C using a thermocycler. The end-prep reaction cleanup was performed by adding  
446 60 µl of resuspended AMPure XP beads and mtDNA was eluted in 31 µl NFW. A 1 µl  
447 aliquot from the elute was quantified by fluorometry (Qubit) to ensure ≥700 ng end-  
448 prepped mtDNA was retained.

449 Adapter ligation was performed by adding 10 µl of Adapter Mix, 2 µl HP Adapter  
450 (SQK-NSK007 Nanopore sequencing Kit, Oxford Nanopore Technologies), 50 µl NEB  
451 Blunt/TA Master Mix (NEB, cat no M0367), and 8 µl NFW to 30 µl dA-tailed mtDNA,  
452 mixing gently and incubating at room temperature for 10 minutes. 1 µl of HP Tether  
453 (SQK-NSK007) was added to the mix and incubated for 10 minutes (RT).

454 Library purification of the adapted and tethered mtDNA was performed by adding  
455 MyOne C1 Streptavidin Beads, incubated for 5 minutes at room temperature and  
456 resuspended the pellet in 150 µl Bead Binding Buffer (SQK-NSK007). The purified-

457 ligated mtDNA pellet was resuspended in 25  $\mu$ l Elution Buffer (SQK-NSK007),  
458 incubated for 10 minutes at 37 °C and the 25  $\mu$ l elute (Pre-sequencing Mix) was  
459 transferred into a new tube. A 1  $\mu$ l aliquot was quantified by fluorometry (Qubit) to  
460 ensure  $\geq$  500 ng of adapted and tethered mtDNA was retained.

461 The MinION Flow Cell (R9) was primed twice prior to loading sample with 500  $\mu$ l  
462 flow cell priming mix made of 1:1 ratio of Running Buffer with Fuel Mix 1 (RBF1) and  
463 NFW. The library for loading was prepared by adding 12  $\mu$ l adapted and tethered library,  
464 75  $\mu$ l RBF1 and 63  $\mu$ l NFW. Using a P-1000 tip set to 150  $\mu$ l, the library was loaded into  
465 the flow cell keeping the pipette vertical. The flow cell was run on the 48h 2D protocol.

#### 466 Data Analysis

467 Nanopore sequencing reads were processed using the Metrichor cloud platform  
468 2D workflow. Only the reads (Fast5 files) that passed Metrichor quality cutoffs were  
469 converted into fastq format using poretools (v0.5)<sup>42</sup>. The reads were aligned against the  
470 Plasmodium falciparum 3D7 (PlasmoDB v28)<sup>43</sup> reference genome using the BWA-MEM  
471 (v0.7.15)<sup>44</sup> with settings “-x ont2d”. The aligned data was used to generate a .bam file  
472 using SAMtools (v1.3.1)<sup>45</sup> and BCFtools (v1.3.1). Finally, alignments were visually  
473 inspected using IGV viewer<sup>46</sup> in an attempt to trace back the % Y268S mutation in the  
474 parasite.

475

476

477

478

479 **Figure legends**

480 **Figure 1.** Pyrosequencing assessment of Y268S allele in patient isolates and drug  
481 selection strategy. A. Y268S cytochrome *b* pyrosequencing assay standard curve  
482 reliably detects frequencies of wild-type and mutant alleles. Using wt and mutant gDNA  
483 mixtures from 0% to 100% wt, the standard curve shows the correlation between the  
484 percentage of wt DNA expected in each mixture and the pyrosequencing assay's ability  
485 to detect that percentage, with a correlation coefficient of  $R^2=0.9946$ . B.  
486 Pyrosequencing analysis of the Y268S allele in admission and recrudescence isolates  
487 from Phase II studies in Thailand. Pyrosequencing analysis of control lab strains that  
488 lack the Y268S allele indicate that there is a very low false positive detection rate using  
489 this assay. Admission isolates show low level Y268S heteroplasmy, as well as "wt"  
490 treatment failure TM90-C6B, and recrudescence parasites show high levels of the Y268S  
491 allele. C. *In vitro* drug selections with clinical isolates harboring cryptic Y268S alleles.  
492 Admission isolates from the Phase II studies of ATO in Thailand (TM90-C2A and TM90-  
493 C40B2) and isolate from Thailand in 2008 (ARC08-22-4G) all had low level Y268S  
494 heteroplasmy, and rapidly developed majority Y268S mtDNA after exposure to  
495 10xEC50 ATO, recovering after 15-32 days.

496

497 **Figure 2.** Using mitochondrial deep sequencing to identify low frequency heteroplasmy  
498 sites in patient isolates and from *in vitro* drug selections. A. Deep sequencing shows  
499 heteroplasmy/homoplasmy status of patient admission/recrudescence isolates and *in vitro*  
500 drug selected parasites at known ATO resistance alleles. Parasites were taken from  
501 earliest cryopreserved isolates and mtDNA was sequenced at > 10,000x coverage to

502 preserve respective phenotypes/genotypes. B. Histogram plot shows the distribution of  
503 estimated copy number of nuclear and mitochondria genomes (yellow line indicates the  
504 median value). For 1279 *P. falciparum* genome samples, we extracted median  
505 coverage (DP) for each reported sites in chromosome 2 (*N*, median value 1.00) and  
506 mitochondria genome (*M*, median value 21.75). C. Heteroplasmy and copy number from  
507 clinical isolates and *in vitro* drug selection studies. Both Y268S heteroplasmy and copy  
508 number variations were found in *in vitro* drug selection studies.

509  
510 **Figure 3.** Analysis of the *P. falciparum* mitochondrial genetic diversity with data from the  
511 MalariaGEN Pf3K<sup>28</sup> project and single molecule sequencing. A. Analysis of the  
512 heteroplasmic mitochondrial diversity in the 1279 parasite genome collection. A total of  
513 1033 high-confidence SNPs with hundreds of mapped reads for support were studied.  
514 B. Geographical specific polymorphisms are found in both homoplasmy and  
515 heteroplasmy SNPs in Cambodia and Ghana. Cambodian isolates have higher diversity  
516 and higher mitochondrial copy numbers. C. Boxplot shows the copy number distribution  
517 of mitochondria in different regions. The regions are ranked based on the median value  
518 of copy number. The data from Nigeria is not shown here due to low sample number (*n*  
519 = 3). D. In the global population of 1279 parasites, number of SNPs per isolate is  
520 estimated with a Poisson distribution (Difference between homoplasmy and  
521 heteroplasmy *p*value < 0.001). E: Low level Y268S heteroplasmy is a common, low  
522 level SNP found in all patient admission isolates from the Phase II clinical trial, in  
523 contrast to high frequency, common heteroplasmic loci. F. Nanopore sequencing covers  
524 the nuclear genome at > 6x and mitochondrial genome at >500x. G Average reads

525 length of Nanopore sequencing is 5 kb; and the longest read is 40 kb. H. Nanopore  
526 sequencing and NGS found the same allele frequencies. Y268S heteroplasmy is shown  
527 on a 20 kb single molecule reads with two tandemly arranged mitochondrial DNA units.

528

## 529 **References:**

- 530 1 World Malaria Report 2016. (World Health Organization, 2016).  
531 2 Bueno, J. M. *et al.* Potent antimalarial 4-pyridones with improved physico-  
532 chemical properties. *Bioorg Med Chem Lett* **21**, 5214-5218,  
533 doi:10.1016/j.bmcl.2011.07.044 (2011).  
534 3 Yeates, C. L. *et al.* Synthesis and structure-activity relationships of 4-pyridones  
535 as potential antimalarials. *J Med Chem* **51**, 2845-2852, doi:10.1021/jm0705760  
536 (2008).  
537 4 Bueno, J. M. *et al.* Exploration of 4(1H)-pyridones as a novel family of potent  
538 antimalarial inhibitors of the plasmodial cytochrome bc1. *Future medicinal*  
539 *chemistry* **4**, 2311-2323, doi:10.4155/fmc.12.177 (2012).  
540 5 Winter, R. W. *et al.* Evaluation and lead optimization of anti-malarial acridones.  
541 *Exp Parasitol* **114**, 47-56, doi:10.1016/j.exppara.2006.03.014 (2006).  
542 6 Cross, R. M. *et al.* Optimization of 1,2,3,4-tetrahydroacridin-9(10H)-ones as  
543 antimalarials utilizing structure-activity and structure-property relationships.  
544 *Journal of medicinal chemistry* **54**, 4399-4426, doi:10.1021/jm200015a (2011).  
545 7 Biagini, G. A. *et al.* Acridinediones: selective and potent inhibitors of the malaria  
546 parasite mitochondrial bc1 complex. *Mol Pharmacol* **73**, 1347-1355,  
547 doi:10.1124/mol.108.045120 (2008).  
548 8 Raether, W. *et al.* Antimalarial activity of new floxacrine-related acridinedione  
549 derivatives: studies on blood schizontocidal action of potential candidates against  
550 *P. berghei* in mice and *P. falciparum* in vivo and in vitro. *Parasitol Res* **75**, 619-  
551 626 (1989).  
552 9 Biagini, G. A. *et al.* Generation of quinolone antimalarials targeting the  
553 Plasmodium falciparum mitochondrial respiratory chain for the treatment and  
554 prophylaxis of malaria. *Proc Natl Acad Sci U S A* **109**, 8298-8303,  
555 doi:10.1073/pnas.1205651109 (2012).  
556 10 Cross, R. M. *et al.* Synthesis, antimalarial activity, and structure-activity  
557 relationship of 7-(2-phenoxyethoxy)-4(1H)-quinolones. *Journal of medicinal*  
558 *chemistry* **54**, 8321-8327, doi:10.1021/jm200718m (2011).  
559 11 Cross, R. M. *et al.* Endochin optimization: structure-activity and structure-  
560 property relationship studies of 3-substituted 2-methyl-4(1H)-quinolones with  
561 antimalarial activity. *Journal of medicinal chemistry* **53**, 7076-7094,  
562 doi:10.1021/jm1007903 (2010).  
563 12 Winter, R. *et al.* Optimization of endochin-like quinolones for antimalarial activity.  
564 *Exp Parasitol* **127**, 545-551, doi:10.1016/j.exppara.2010.10.016 (2011).



- 565 13 Srivastava, I. K., Rottenberg, H. & Vaidya, A. B. Atovaquone, a broad spectrum  
566 antiparasitic drug, collapses mitochondrial membrane potential in a malarial  
567 parasite. *J Biol Chem* **272**, 3961-3966 (1997).
- 568 14 Looareesuwan, S. *et al.* Clinical studies of atovaquone, alone or in combination  
569 with other antimalarial drugs, for treatment of acute uncomplicated malaria in  
570 Thailand. *The American journal of tropical medicine and hygiene* **54**, 62-66  
571 (1996).
- 572 15 Schwartz, E., Bujanover, S. & Kain, K. C. Genetic Confirmation of Atovaquone-  
573 Proguanil-Resistant Plasmodium falciparum Malaria Acquired by a Nonimmune  
574 Traveler to East Africa. *Clinical Infectious Diseases* **37**, 450-451,  
575 doi:10.1086/375599 (2003).
- 576 16 Musset, L., Bouchaud, O., Matheron, S., Massias, L. & Le Bras, J. Clinical  
577 atovaquone-proguanil resistance of Plasmodium falciparum associated with  
578 cytochrome b codon 268 mutations. (2006).
- 579 17 Musset, L., Le Bras, J. & Clain, J. Parallel evolution of adaptive mutations in  
580 Plasmodium falciparum mitochondrial DNA during atovaquone-proguanil  
581 treatment. *Mol Biol Evol* **24**, 1582-1585, doi:10.1093/molbev/msm087 (2007).
- 582 18 Korsinczky, M. *et al.* Mutations in Plasmodium falciparum cytochrome b that are  
583 associated with atovaquone resistance are located at a putative drug-binding  
584 site. *Antimicrob Agents Chemother* **44**, 2100-2108 (2000).
- 585 19 Ross, L. S. *et al.* In vitro resistance selections for Plasmodium falciparum  
586 dihydroorotate dehydrogenase inhibitors give mutants with multiple point  
587 mutations in the drug-binding site and altered growth. *J Biol Chem* **289**, 17980-  
588 17995, doi:10.1074/jbc.M114.558353 (2014).
- 589 20 Bopp, S. E. *et al.* Mitotic evolution of Plasmodium falciparum shows a stable core  
590 genome but recombination in antigen families. *PLoS Genet* **9**, e1003293,  
591 doi:10.1371/journal.pgen.1003293 (2013).
- 592 21 Preston, M. D. *et al.* A barcode of organellar genome polymorphisms identifies  
593 the geographic origin of Plasmodium falciparum strains. *Nat Commun* **5**, 4052,  
594 doi:10.1038/ncomms5052 (2014).
- 595 22 Cottrell, G., Musset, L., Hubert, V., Le Bras, J. & Clain, J. Emergence of  
596 resistance to atovaquone-proguanil in malaria parasites: insights from  
597 computational modeling and clinical case reports. *Antimicrob Agents Chemother*  
598 **58**, 4504-4514, doi:10.1128/aac.02550-13 (2014).
- 599 23 Conaway, J. L. *Detection and Epidemiological Patterns of Drug Resistance*  
600 *Mutations in NYS Plasmodium falciparum Clinical Data Specimens*, University at  
601 Albany, (2012).
- 602 24 Rathod, P. K., McErlean, T. & Lee, P. C. Variations in frequencies of drug  
603 resistance in Plasmodium falciparum. *Proc Natl Acad Sci U S A* **94**, 9389-9393  
604 (1997).
- 605 25 Blake, L. D. *et al.* Menoctone Resistance in Malaria Parasites Is Conferred by  
606 M133I Mutations in Cytochrome b That Are Transmissible through Mosquitoes.  
607 LID - e00689-17 [pii] LID - 10.1128/AAC.00689-17 [doi]. (2017).
- 608 26 Schwobel, B., Alifrangis, M., Salanti, A. & Jelinek, T. Different mutation patterns  
609 of atovaquone resistance to Plasmodium falciparum in vitro and in vivo: rapid

- 610 detection of codon 268 polymorphisms in the cytochrome b as potential in vivo  
611 resistance marker. *Malar J* **2**, 5 (2003).
- 612 27 Guler, J. L. *et al.* Asexual populations of the human malaria parasite,  
613 *Plasmodium falciparum*, use a two-step genomic strategy to acquire accurate,  
614 beneficial DNA amplifications. *PLoS Pathog* **9**, e1003375,  
615 doi:10.1371/journal.ppat.1003375 (2013).
- 616 28 The Pf3K Project: pilot data release 5. (2016).
- 617 29 Benjamini, Y. & Speed, T. P. Summarizing and correcting the GC content bias in  
618 high-throughput sequencing. *Nucleic Acids Res* **40**, e72-e72,  
619 doi:10.1093/nar/gks001 (2012).
- 620 30 Gerald, N., Mahajan, B. & Kumar, S. Mitosis in the human malaria parasite  
621 *plasmodium falciparum*. *Eukaryotic Cell* **10**, 474-482 (2011).
- 622 31 Beghain, J. *et al.* Plasmodium copy number variation scan: gene copy numbers  
623 evaluation in haploid genomes. *Malaria journal* **15**, 206, doi:10.1186/s12936-016-  
624 1258-x (2016).
- 625 32 McKenna, A. *et al.* The Genome Analysis Toolkit: a MapReduce framework for  
626 analyzing next-generation DNA sequencing data. *Genome research* **20**, 1297-  
627 1303 (2010).
- 628 33 Jain, M., Olsen, H. E., Paten, B. & Akeson, M. The Oxford Nanopore MinION:  
629 delivery of nanopore sequencing to the genomics community. *Genome biology*  
630 **17**, 239 (2016).
- 631 34 Goodman, C. D. *et al.* Parasites resistant to the antimalarial atovaquone fail to  
632 transmit by mosquitoes. *Science* (2016).
- 633 35 Trager, W. & Jensen, J. B. Human Malaria Parasites in Continuous Culture.  
634 *Journal of Parasitology* **91**, 484-486, doi:10.1645/0022-  
635 3395(2005)091[0484:hmpicc]2.0.co;2 (2005).
- 636 36 Webster, H. K., Boudreau, E.F., Pavanand, K., Youngvanithchit, K., Pang, L.W.  
637 Antimalarial drug susceptibility testing of *Plasmodium falciparum* in Thailand  
638 using a microdilution radioisotope method. *Am J Trop Med Hyg* **34**, 228-235  
639 (1985).
- 640 37 Rosario, V. Cloning of naturally occurring mixed infections of malaria parasites.  
641 *Science* **212**, 1037 (1981).
- 642 38 Chavchich, M. *et al.* Role of *pfmdr1* amplification and expression in induction of  
643 resistance to artemisinin derivatives in *Plasmodium falciparum*. *Antimicrob*  
644 *Agents Chemother* **54**, 2455-2464, doi:10.1128/aac.00947-09 (2010).
- 645 39 Pfaffl, M. W. A new mathematical model for relative quantification in real-time  
646 RT-PCR. *Nucleic Acids Research* **29**, e45-e45 (2001).
- 647 40 Van der Auwera, G. A. *et al.* From FastQ data to high-confidence variant calls:  
648 the genome analysis toolkit best practices pipeline. *Current protocols in*  
649 *bioinformatics*, 11.10. 11-11.10. 33 (2013).
- 650 41 Li, H. A statistical framework for SNP calling, mutation discovery, association  
651 mapping and population genetical parameter estimation from sequencing data.  
652 *Bioinformatics* **27**, 2987-2993 (2011).
- 653 42 Loman, N. J. & Quinlan, A. R. Poretools: a toolkit for analyzing nanopore  
654 sequence data. *Bioinformatics* **30**, 3399-3401 (2014).

655 43 Aurrecochea, C. *et al.* PlasmoDB: a functional genomic database for malaria  
656 parasites. *Nucleic acids research* **37**, D539-D543 (2008).  
657 44 Li, H. Aligning sequence reads, clone sequences and assembly contigs with  
658 BWA-MEM. *arXiv preprint arXiv:1303.3997* (2013).  
659 45 Li, H. *et al.* The sequence alignment/map format and SAMtools. *Bioinformatics*  
660 **25**, 2078-2079 (2009).  
661 46 Thorvaldsdóttir, H., Robinson, J. T. & Mesirov, J. P. Integrative Genomics Viewer  
662 (IGV): high-performance genomics data visualization and exploration. *Briefings in*  
663 *bioinformatics* **14**, 178-192 (2013).  
664

665

Table 1.

Drug susceptibility (IC<sub>50</sub>s, nM) of *Plasmodium falciparum* isolates and clones to mitochondrial electron chain inhibitors reveal three atovaquone (ATO) resistance phenotypes\*

|            |             |              | Complex III             |      |                         |         |        |           |         | Cyt. <i>b</i> genotype | Admission/<br>Recrudescence |
|------------|-------------|--------------|-------------------------|------|-------------------------|---------|--------|-----------|---------|------------------------|-----------------------------|
|            | NDH2 enzyme | DHODH enzyme | Qo site (cyt <i>b</i> ) |      | Qi site (cyt <i>b</i> ) |         |        | unknown   |         |                        |                             |
|            | HDQ         | DSM-1        | ATO                     | MYX  | ANT                     | ELQ 300 | GSK121 | ICI56,780 | P4Q-391 |                        |                             |
| W2         | 55.0        | 52.4         | 0.41                    | 10.8 | 165.5                   | 2.72    | 3.39   | 0.03      | 11.1    | WT                     | --                          |
| TM90-C6B   | ND          | 24.5         | 109                     | 7.45 | 125                     | 7.67    | 36.4   | 0.50      | 33.0    | WT                     | R                           |
| TM90-C2A   | 14.8        | 79.4         | 3.09                    | 154  | 72.0                    | 0.69    | 20.2   | 0.04      | 1.92    | WT                     | A                           |
| TM90-C2B   | 146         | 57.4         | 5290                    | 428  | 152                     | 4.61    | 77.5   | 14.3      | 55.5    | Y268S                  | R                           |
| TM90-C40B2 | 830         | 47.2         | 1.53                    | 45.1 | 72.9                    | 4.02    | 7.84   | 0.04      | 22.1    | WT                     | A                           |
| TM90-C50B5 | ND          | ND           | 3940                    | 3010 | ND                      | 6.45    | 122    | 13.4      | 32.4    | Y268S                  | R                           |
| TM92-C1086 | 180         | 770          | 31400                   | 4160 | >18200                  | 16300   | 2470   | 882       | 14160   | Y268S                  | R                           |
| TM90-C1088 | 252         | 540          | 29100                   | 3990 | >18200                  | 21000   | 3470   | 219       | >20200  | Y268S                  | R                           |

\*Atovaquone (ATO) Resistance phenotypes: low (light grey), moderate (grey), and extreme (dark grey); Drugs: HDQ – 1-hydroxy-2-dodecyl-4(1H)-quinolone; MYX – myxothiazol; DSM-1 – triazolopyrimidine; ANT – antimycin A; GSK121 – GSK932121A, 4(1H)-pyridone; ICI56,780 – phenoxyethoxy-4(1H)-quinolone; P4Q-391 – 4(1H)-quinolone

Extended Data Table 1.

Cytochrome b mutations induced by drug selection with atovaquone (ATO) and menoctone (MEN) in vitro

| Parasite    | Drug  | Cyt. <i>b</i> mutation(s)                | Source                        |
|-------------|-------|------------------------------------------|-------------------------------|
| D6          | ATO   | No resistance                            | Rathod <i>et al.</i> 1997     |
| 3D7         |       | M133I                                    | Korsinczky <i>et al.</i> 2000 |
|             |       | M133I & P275T                            |                               |
|             |       | M133I & K272R                            |                               |
|             |       | M133I & G280D                            |                               |
|             |       | L283I & V284K                            |                               |
| 3D7         |       | M133V<br>M133I<br>M133I & L144S<br>F267V | Bopp <i>et al.</i> 2013       |
| K1          |       | M133I<br>M133I & G280D                   | Schwobel <i>et al.</i> 2003   |
| AT200       |       | M133I<br>M133I & L271F                   | Schwobel <i>et al.</i> 2003   |
| TM90-C2A    |       | Y268S                                    | This study                    |
| TM90-C40B2  | Y268S | This study                               |                               |
| ARC08-88-8A | Y268S | This study                               |                               |
| W2          | MEN   | M133I                                    | This study                    |
| TM90-C2A    |       | Y268S                                    | This study                    |

Extended Data Table 2.

Treatment regimens and cytochrome b (cyt b) genotypes of admission (A) and recrudescence (R) isolates of *Plasmodium falciparum* from Phase II clinical studies with atovaquone (ATO) alone or in combination with pyrimethamine (PYR)<sup>14</sup>

| Treatment Regimen                      | Patient No. | Admission/Recrudescence | Isolate | Cyt. b mutation |
|----------------------------------------|-------------|-------------------------|---------|-----------------|
| ATO 750 mg<br>q8h x 4                  | 2           | A                       | C2A     | --              |
|                                        |             | R                       | C2B     | Y268S           |
|                                        | 6           | A                       | C6A     | --              |
|                                        |             | R                       | C6B     | --              |
| ATO 750 mg<br>q8h x 21                 | 29          | A                       | C40     | --              |
|                                        |             | R                       | C50     | Y268S           |
|                                        | 32          | R                       | C32B    | Y268N           |
| ATO 1000 mg plus<br>PYR 25 mg q24h x 3 | 210         | A                       | C1028   | --              |
|                                        |             | R                       | C1086   | Y268S           |
|                                        | 207         | A                       | C1051   | --              |
|                                        |             | R                       | C1090   | Y268N           |
|                                        | 206         | R                       | C1088   | Y268S           |

Extended Data Table 3.

Sanger sequence results of candidate mtETC resistance genes in patient isolates and reference clones of *P. falciparum*

| Gene ID                                | Parasite names (abbreviated) |       |       |       |     |     |       |       |       |       |       |       |
|----------------------------------------|------------------------------|-------|-------|-------|-----|-----|-------|-------|-------|-------|-------|-------|
|                                        | W2                           | D6    | C2A   | C2B   | C6A | C6B | C40B2 | C50B5 | C1051 | C1090 | C1086 | C1088 |
| PF3D7_0915000<br>(NDH2)                | --                           | --    | --    | --    | --  | --  | --    | --    | ND    | ND    | --    | --    |
| PF3D7_0603300<br>(DHODH)               | --                           | --    | --    | --    | --  | --  | --    | --    | --    | --    | --    | --    |
| MAL_MITO_1<br>(COXIII, Complex IV)     | --                           | I239V | I239V | I239V | --  | --  | I239V | I239V | I239V | --    | --    | --    |
| MAL_MITO_2<br>(COXI, Complex IV)       | --                           | --    | --    | --    | --  | --  | --    | --    | --    | --    | --    | --    |
| MAL_MITO_3<br>(Cyt. <i>b</i> )         | --                           | --    | --    | Y268S | --  | --  | Y268S | Y268S | --    | Y268N | Y268S | Y268S |
| PF3D7_0523100<br>(Core 1, Complex III) | --                           | --    | --    | --    | --  | --  | --    | --    | ND    | ND    | --    | --    |
| PF3D7_093360<br>(Core 2, Complex III)  | --                           | --    | --    | --    | --  | --  | --    | --    | ND    | ND    | --    | --    |
| PF3D7_1439400<br>(Rieske, Complex III) | --                           | --    | --    | --    | --  | --  | --    | --    | ND    | ND    | --    | --    |
| PF3D7_1426900<br>(QCR6, Complex III)   | --                           | --    | --    | --    | --  | --  | --    | --    | ND    | ND    | --    | --    |
| PF3D7_1012300<br>(QCR7, Complex III)   | --                           | --    | --    | --    | --  | --  | --    | --    | ND    | ND    | --    | --    |
| PF3D7_1462700<br>(Cyt. <i>c1</i> )     | --                           | --    | --    | --    | --  | --  | --    | --    | ND    | ND    | ND    | --    |

-- Indicates wild type sequence; ND – not determined

Extended Data Table 4.

| Genotypes of DSM1 drug selections immediately following recovery |                          |                            |                            |                             |
|------------------------------------------------------------------|--------------------------|----------------------------|----------------------------|-----------------------------|
| DSM1-selected populations                                        | <i>dhodh</i> copy number | PFF_0160C ( <i>dhodh</i> ) | MALMITO_3 (cyt. <i>b</i> ) | MALMITO_1 ( <i>coxIII</i> ) |
| C2A+10xDSM1-1A                                                   | 3                        | WT                         | WT                         | I239V                       |
| C2A+10x DSM1-2B                                                  | 1                        | R265G                      | Y268S/WT                   | I239V                       |
| C2B+2xDSM1-1A                                                    | 2                        | WT                         | Y268S/WT                   | I239V                       |
| C2B+2xDSM1-1B                                                    | 2                        | WT                         | Y268S/WT                   | I239V                       |
| C2B+2xDSM1-3B                                                    | 1.5                      | WT                         | Y268S/WT                   | I239V                       |
| C2B+2xDSM1-2C                                                    | 1                        | WT                         | Y268S/WT                   | I239V                       |



Extended Data Table 5.

---

PCR Primers and Programs Used in mtETC Sequencing

---

|                                                            |                                                                                    |                                                                                                                                                                                                               |            |                                                                              |
|------------------------------------------------------------|------------------------------------------------------------------------------------|---------------------------------------------------------------------------------------------------------------------------------------------------------------------------------------------------------------|------------|------------------------------------------------------------------------------|
| PCR FOR<br>PCR REV<br>SEQ PR<br>SEQ PR<br>SEQ PR<br>SEQ PR | 0120PCRFOR<br>0120PCRREV<br>0120FORINT<br>0120E1REV<br>0120E1FOR<br>0120REVINT     | 5'—CTAACCGCGTTTGTCTAACC—3'<br>5'—CTGGTGGTATCGTGTCAATC—3'<br>5'—ATTCAGCTCCAAGCCTGTTC—3'<br>5'—TAAGAGCACCATATGAGAGATGG—3'<br>5'—CAAGGAGATATAGAAGGATGTTAAGAGGAAAC—3'<br>5'—AGCAGCCATACCTCATTC—3'                 | 2733<br>bp | 94°-1:00<br>32 cycles:<br>94°-0:20<br>52°-0:20<br>58°-4:00                   |
| PCR FOR<br>PCR REV<br>SEQ PR<br>SEQ PR<br>SEQ PR<br>SEQ PR | 0735PCRFOR<br>0735PCRREV<br>0735FORINT<br>0735REVINT<br>0735FORINT2<br>0735REVINT2 | 5'—ACCCTAATTCGCCTGCTC—3'<br>5'—GGTTCCTCCAAATCACATGC—3'<br>5'—GTTTCAGGAAATGTGGACAAG—3'<br>5'—CAAATGGTATGGGCGTCTT—3'<br>5'—TATGGTCTTCTTATCTGGGCTAGTGG—3'<br>5'—CATGTAGCTGTTGTAGGAGGAGGTC—3'                     | 5038<br>bp | 94°-1:00<br>32 cycles:<br>94°-0:20<br>55°-0:20<br>58°-4:00                   |
| PCR FOR<br>PCR REV<br>SEQ PR<br>SEQ PR                     | 0248PCRFOR<br>0248PCRREV<br>0248FORINT<br>0248REVINT                               | 5'—CTTGACACATTCACCTGAAC—3'<br>5'—ACAGTACATTCTTGTGGGAC—3'<br>5'—GCAGTCAAATGTGTAAGACCAG—3'<br>5'—ACAGTACATTCTTGTGGGAC—3'                                                                                        | 2707<br>bp | 94°-1:00<br>32 cycles:<br>94°-0:20<br>52°-0:20<br>58°-4:00                   |
| PCR FOR<br>PCR REV<br>SEQ PR<br>SEQ PR<br>SEQ PR<br>SEQ PR | 1155PCRFOR<br>1155PCRREV<br>1155REVINT<br>1155E1REV<br>1155E2REV<br>1155E2FOR      | 5'—AGCATAGCACTGAGAACAAG—3'<br>5'—ACGGACAAGAGTTGATACTG—3'<br>5'—GAACCATCGAATACCTCTG—3'<br>5'—GCTTCACGTTTACCTATCGAACAC—3'<br>5'—GTTCTTAAATGAGATAAATGTGCCGACTATG—3'<br>5'—GAATCATGTATGGCCTTTAGTACTCAGCATTTCAG—3' | 3209<br>bp | 94°-1:00<br>32 cycles:<br>94°-0:20<br>55°-0:20<br>58°-3:30                   |
| PCR FOR<br>PCR REV<br>SEQ PR<br>SEQ PR<br>SEQ PR<br>SEQ PR | 1625PCRFOR<br>1625PCRREV<br>1625FORINT<br>1625FORINT2<br>1625REVINT<br>1625REVINT2 | 5'—TCCTGCCCTCTTCATTTG—3'<br>5'—CGAGCAATACAAACGGAC—3'<br>5'—CGAGCAATACAAACGGAC—3'<br>5'—TATGTGCCGTTGGTGATG—3'<br>5'—TGATGACTCAGGTCCAAATG—3'<br>5'—TCAGTACATCGACCTCAG—3'                                        | 3511<br>bp | 94°-1:00<br>32 cycles:<br>94°-0:20<br>55°-0:20<br>58°-3:30                   |
| PCR FOR<br>PCR REV<br>SEQ PR                               | MM2PCRFOR<br>MM2PCRREV<br>MM2REVINT                                                | 5'—CTGGCCTACACTATAAGAAC—3'<br>5'—GAGAATTATGGAGTGGATGGTG—3'<br>5'—GGTATGATACACAGCTCTTC—3'                                                                                                                      | 1809<br>bp | 98°-0:30<br>32 cycles:<br>98°-0:10<br>53°-0:30<br>72°-7:00<br>72°-<br>0:30FE |
| PCR FOR<br>PCR REV                                         | MM1PCRFOR<br>MM1PCRREV                                                             | 5'—TGCGATGAGACGACATGGAG—3'<br>5'—GCTATCAAATGGCGAGAAGGGAAG—3'                                                                                                                                                  | 1008<br>bp | 98°-0:30<br>32 cycles:<br>98°-30s<br>61°-0:30<br>72°-0:15<br>72°-<br>3:00FE  |
| PCR FOR<br>PCR REV<br>SEQ PR<br>SEQ PR                     | MM3PCRFOR<br>MM3PCRREV<br>MM3-2B-REV<br>MM3-2A-FOR                                 | 5'—TGCCTAGACGTATTCTCTG—3'<br>5'—GCTGTAGATGGATGCTTC—3'<br>5'—CTGAGTATTGAGCGGAAC—3'<br>5'—GTGGAGGATATACTGTGAGTG—3'                                                                                              | 1382<br>bp | 98°-0:30<br>32 cycles:<br>98°-0:10<br>54°-0:40<br>72°-0:30<br>72°-<br>7:00FE |
| PCR FOR<br>PCR REV<br>SEQ PR                               | DHODHFOR<br>DHODHREV<br>DHODHINT                                                   | 5'—GATCCCTAGGATGATCTCTAAATTGAAACCTCAATTTATG—3'<br>5'—GATACTCGAGTTAACTTTTGTCTATGCTTTTCGGCCAATG—3'<br>5'—CATTATTTGGATTATATGGGTTTTTTTGAATCTTATAATCCTG—3'                                                         | 1774<br>bp | 94°-1:00<br>32 cycles:<br>94°-0:20<br>55°-0:20<br>58°-3:30                   |
| PCR FOR<br>PCR REV<br>SEQ PR                               | 0597PCRFOR<br>0597PCRREV<br>0597FORINT<br>0597REVINT2                              | 5'—AAAAATGGCTGGTGGGGGAG—3'<br>5'—CCAACGTCCAAAAATAAGAACTAATCCA—3'<br>5'—TTCCTTGTCCTACTGTGTAG—3'<br>5'—GGCAAAGATTCTTCTGGAC—3'                                                                                   | 1428<br>bp | 94°-1:00<br>32 cycles:<br>94°-0:20<br>56°-0:20<br>58°-2:10                   |

# Fig 1

## A Y268 cytochrome *b* pyrosequencing assay standard curve

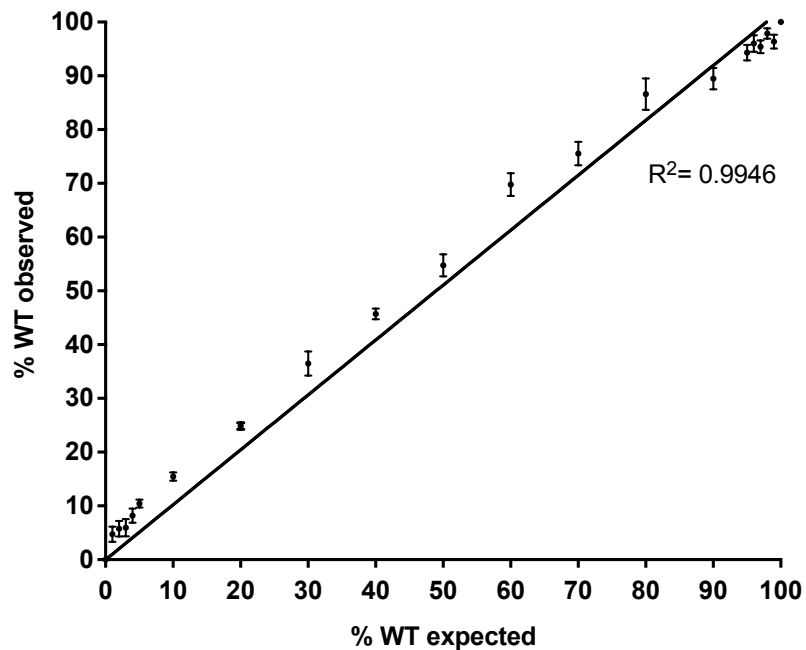

## B

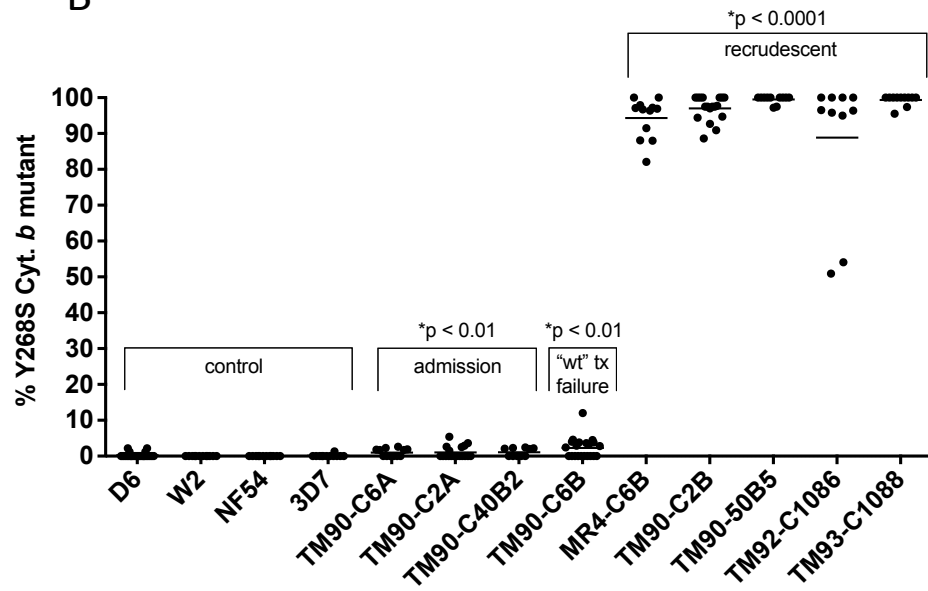

Patient admission and recrudescent isolates from Loareesuwan *et al.* 1997

## C

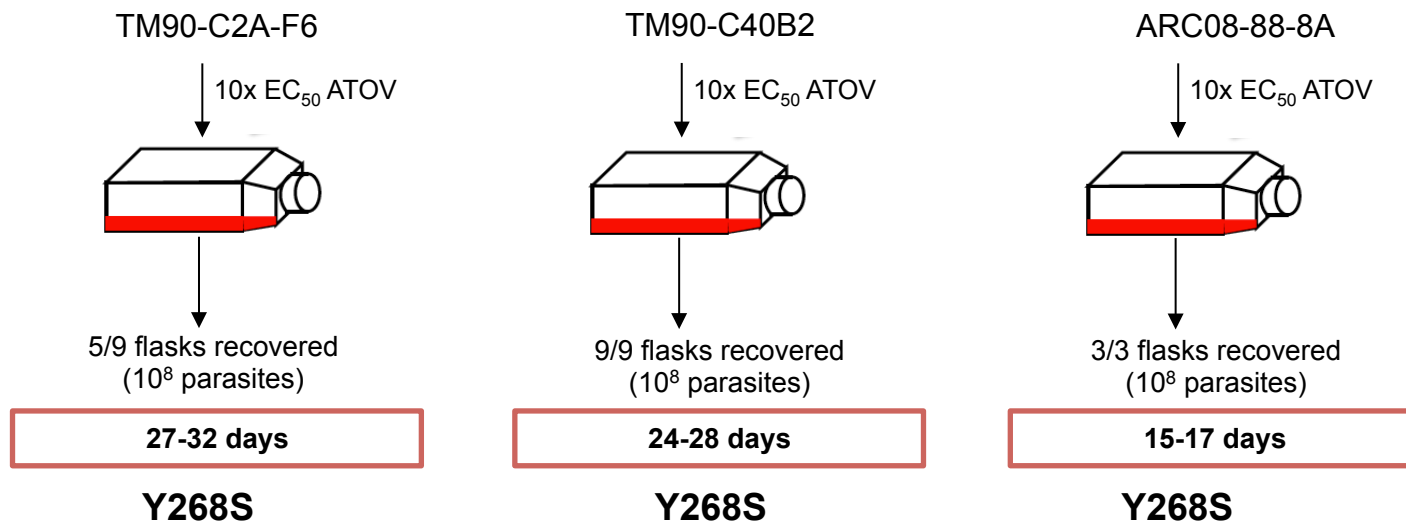

Fig 2

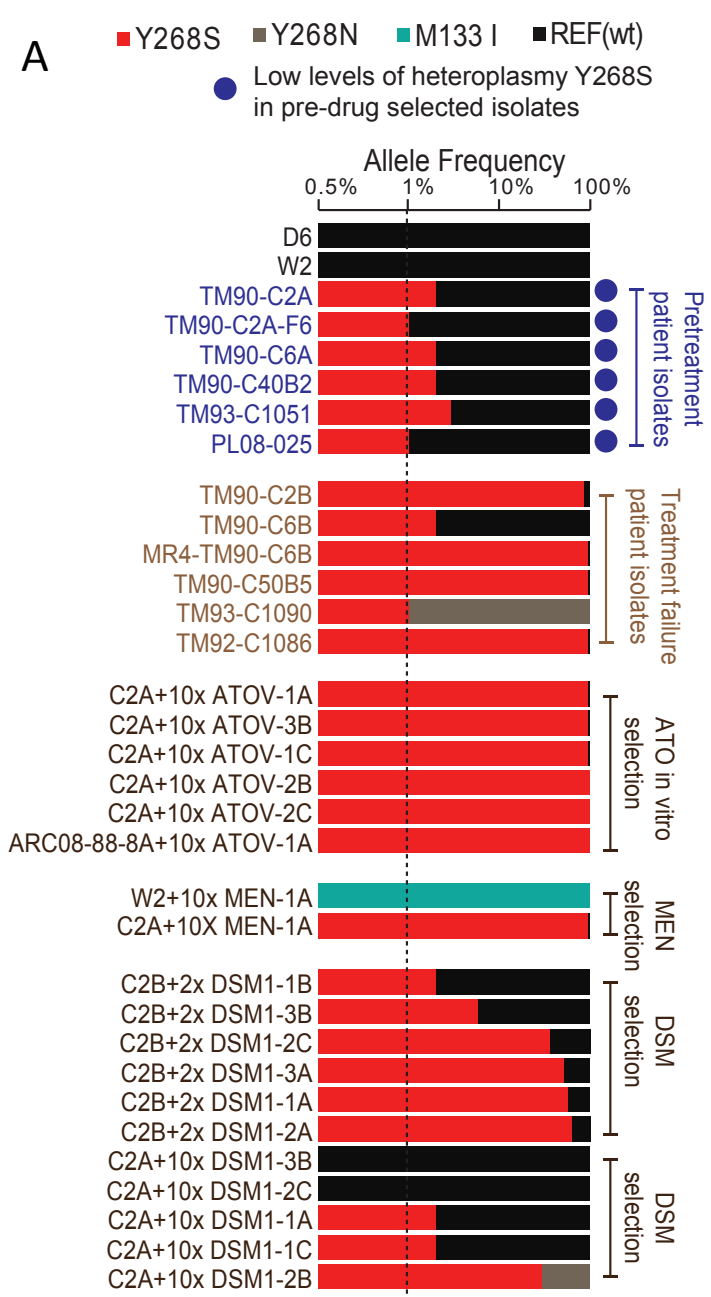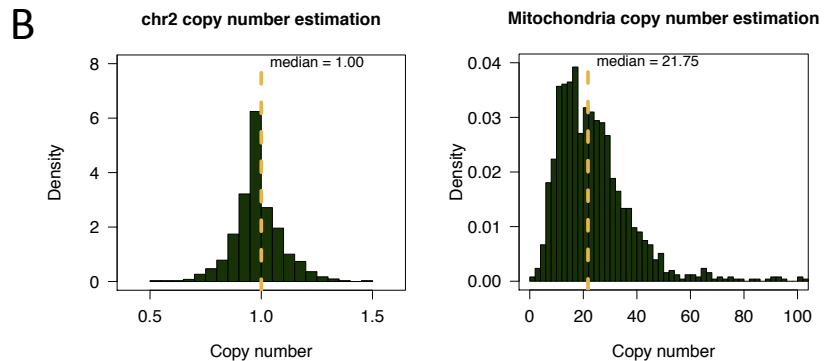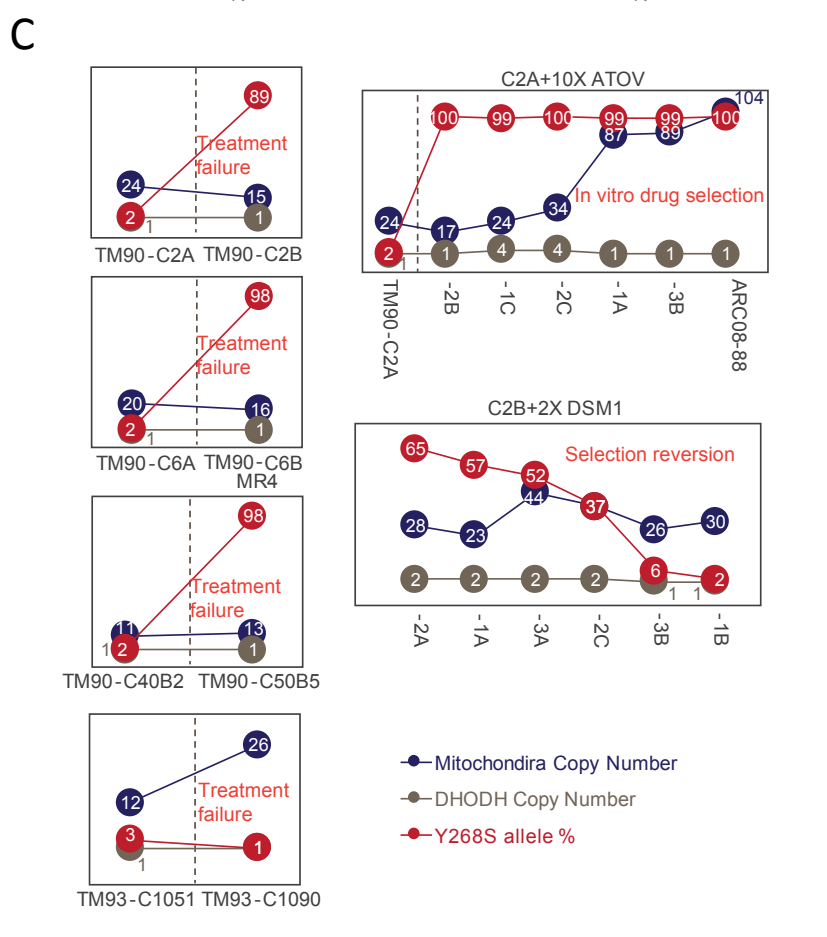

Fig 3

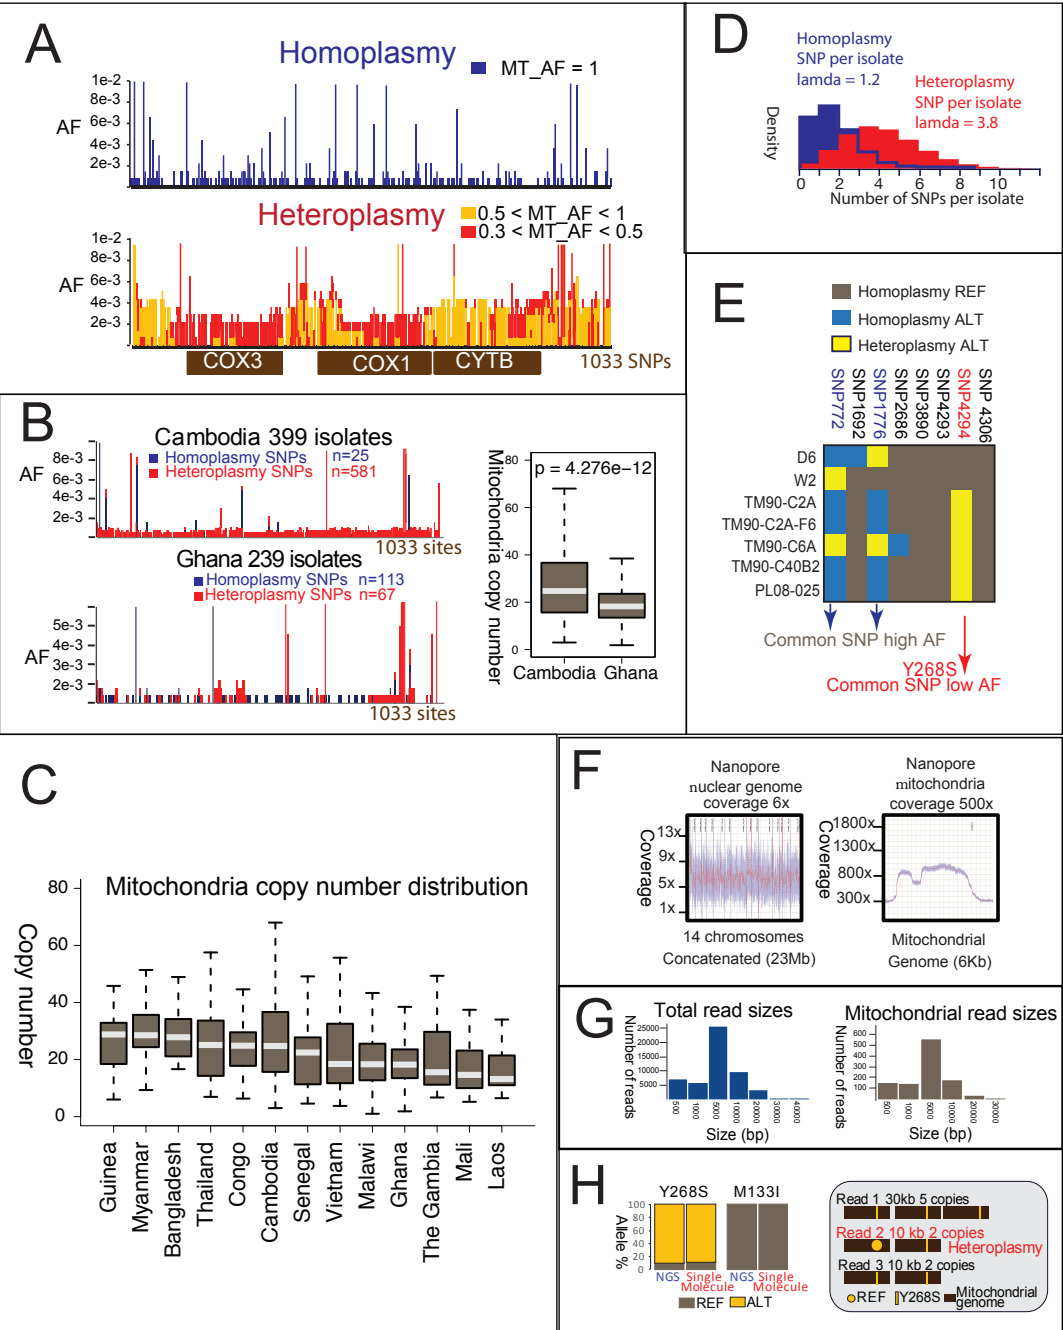

# Extended Figures

# Extended Data Figure 1

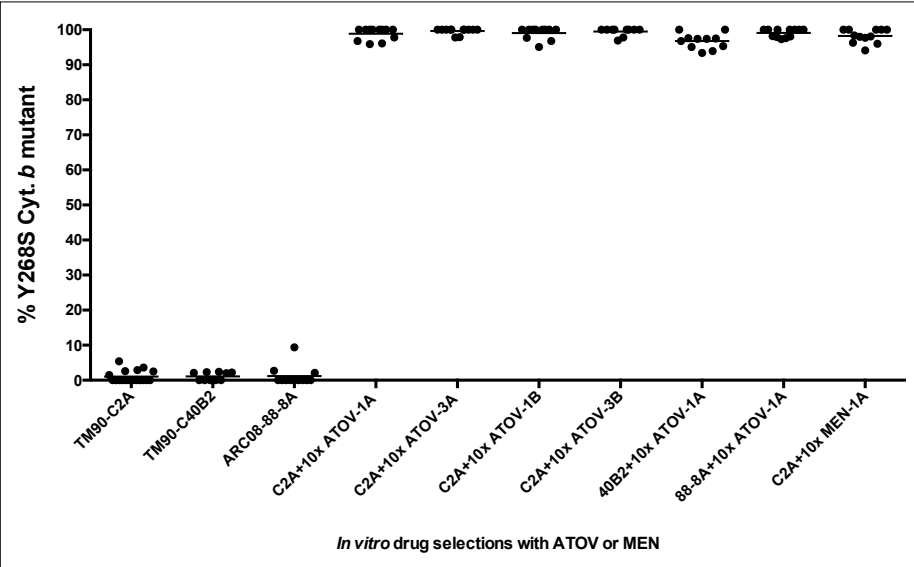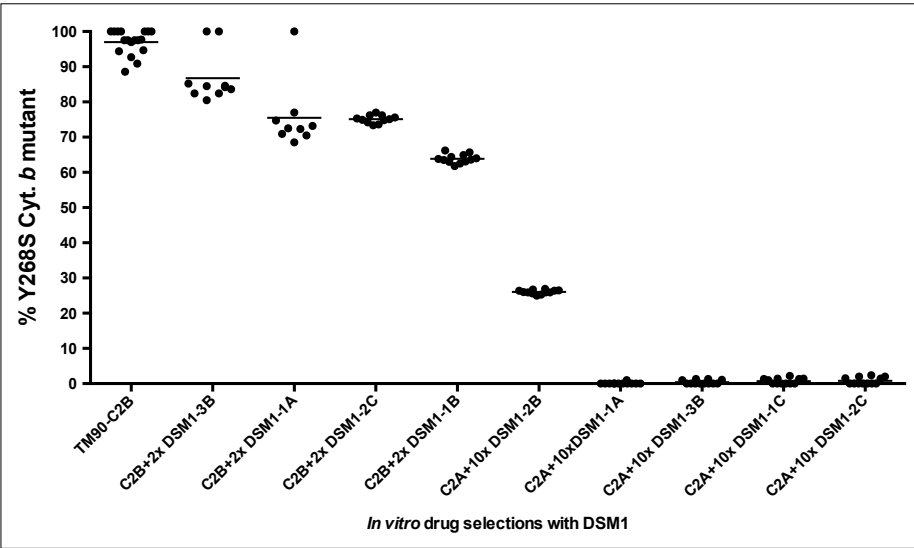

## Y268S mutation is readily selected *in vitro*

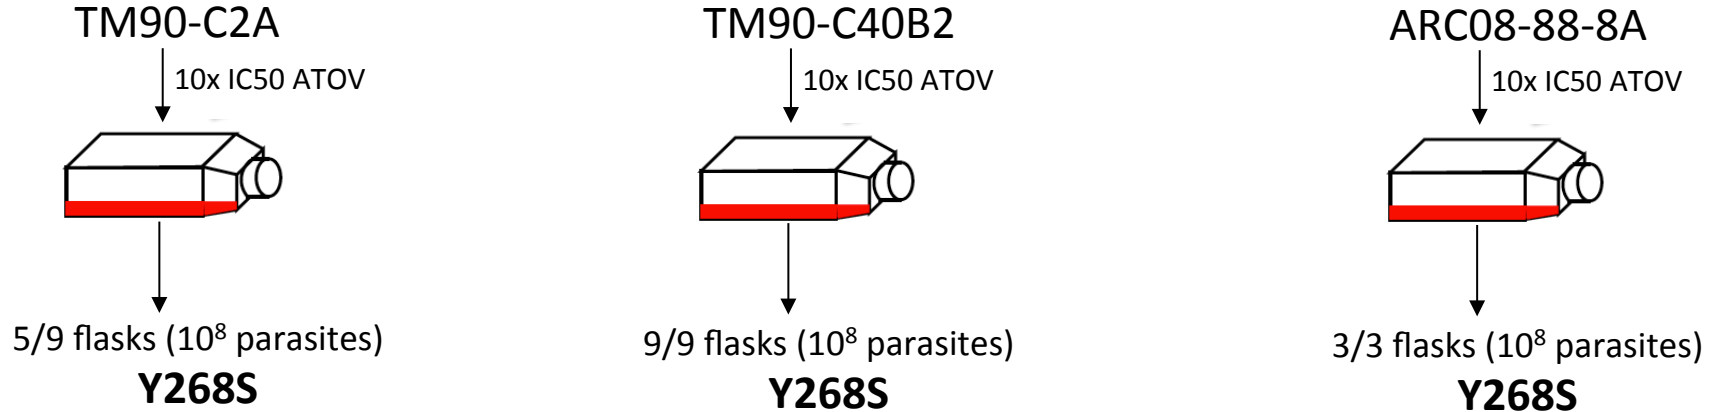

Initial resistance to mitochondrial electron transport chain inhibitors in atovaquone-selected populations of *P. falciparum* (EC<sub>50</sub>, μM) and cytochrome *b* genotypes

| Parasite               | Qo site inhibitors |       | DHODH inhibitor | cyt. <i>b</i> genotype |
|------------------------|--------------------|-------|-----------------|------------------------|
|                        | ATOV               | MYX   | DSM-1           |                        |
| ARC08-88-8A            | 0.0076             | ND    | 0.10            |                        |
| TM90-C2A-F6            | 0.0013             | 0.094 | 0.12            | --                     |
| TM90-C2B-A3            | 12                 | 1.2   | 0.040           | Y268S                  |
| C2A-F6+10x ATOV-1A     | 26.7               | 1.27  | 0.078           | Y268S                  |
| C2A-F6+10x ATOV-3A     | 5.43               | 4.32  | 0.033           | Y268S                  |
| C2A-F6+10x ATOV-1B     | 28.2               | 1.99  | 0.094           | Y268S                  |
| C2A-F6+10x ATOV-2B     | 4.16               | 0.280 | 0.029           | Y268S                  |
| C2A-F6+10x ATOV-3B     | 4.21               | 0.287 | 0.031           | Y268S                  |
| ARC08-88-8A+10xATOV-1A | 63                 | ND    | 0.067           | Y268S                  |



# Menoctone generates cytochrome *b* mutants identical to atovaquone resistance

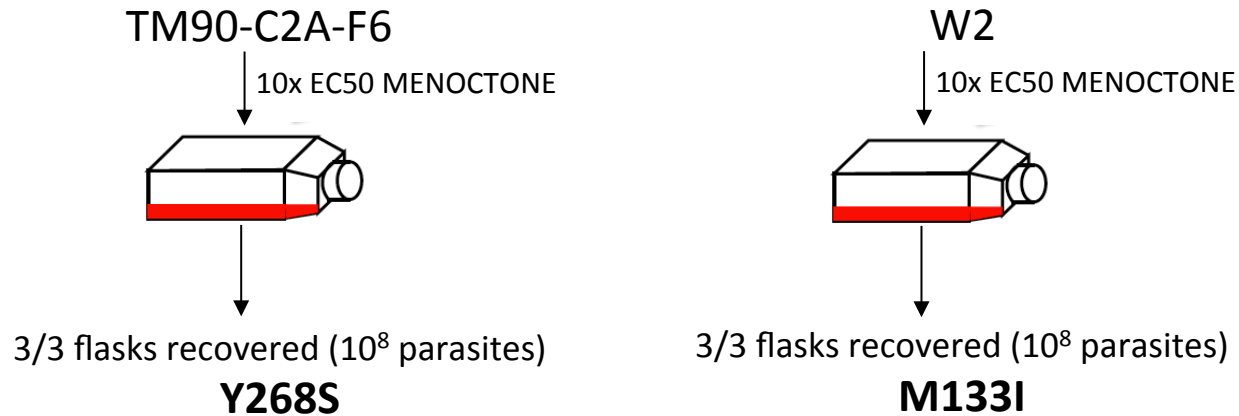

Resistance to mtETC inhibitors in menoctone-selected populations of *P. falciparum* ( $EC_{50}$   $\mu$ M), SEM

| Parasite      | $Q_o$ site inhibitors |                    | DHODH inhibitor    | cyt. <i>b</i> genotype |
|---------------|-----------------------|--------------------|--------------------|------------------------|
|               | ATOV                  | MEN                | DSM-1              |                        |
| W2            | $0.0023 \pm 0.00051$  | $0.12 \pm 0.031$   | $0.11 \pm 0.0018$  |                        |
| TM90-C2A-F6   | $0.0013 \pm 0.00030$  | $0.070 \pm 0.0085$ | $0.067 \pm 0.042$  | --                     |
| TM90-C2B-A3   | $12 \pm 3.0$          | $19 \pm 1.4$       | $0.040 \pm 0.0042$ | Y268S                  |
| C2A+10xMEN-1A | $54 \pm 8.9$          | $23 \pm 2.06$      | $0.052 \pm 0.0023$ | Y268S                  |
| W2+10xMEN-1A  | $0.066 \pm 0.022$     | $18 \pm 6.07$      | $0.16 \pm 0.028$   | M133I                  |

# Extended Data Figure 4

## DSM1-Selection in atovaquone-sensitive and resistant parasites

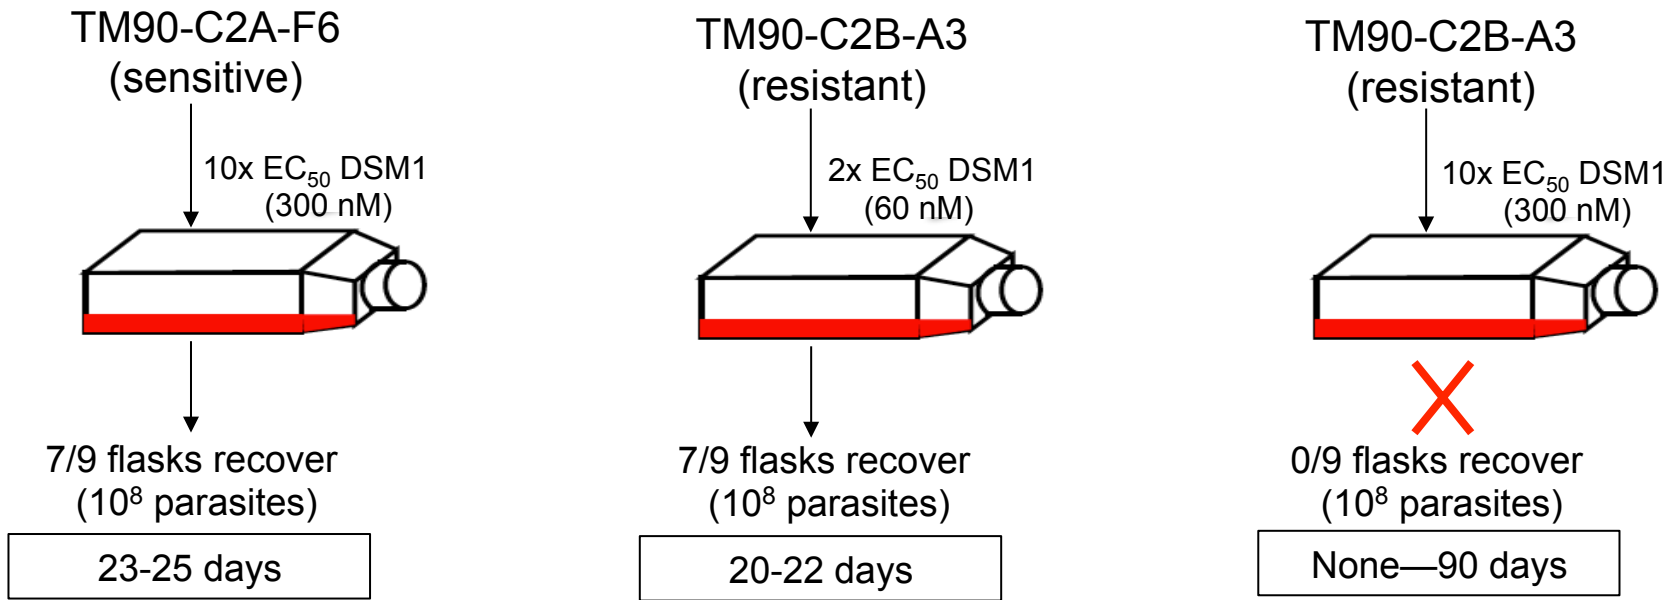

Earliest drug susceptibility profiles of DSM1-resistant *P. falciparum* (μM)

| DSM1-selected populations | ATOV   | MYX   | DHODH |
|---------------------------|--------|-------|-------|
| TM90-C2A-F6               | 0.0013 | 0.094 | 0.067 |
| TM90-C2B-A3               | 12     | 1.2   | 0.040 |
| C2A+10xDSM-1A             | 0.0018 | 0.010 | 0.43  |
| C2A+10xDSM-2B             | 5.8    | 0.56  | 0.22  |
| C2B+2xDSM-1A              | 7.0    | 1.7   | 0.20  |
| C2B+2xDSM-1B              | 31     | 0.62  | 0.55  |
| C2B+2xDSM-3B              | 29     | 5.6   | 0.31  |
| C2B+2xDSM-2C              | 19     | 1.7   | 0.37  |

DSM1 pressure induces DHODH copy number amplifications,  
DHODH mutations, and Y268S heteroplasmy in cytochrome  
*b*

---

Genotypes of DSM1 drug selections immediately following recovery

---

| DSM1-selected populations | <i>dhodh</i> copy number | PFF_0160C ( <i>dhodh</i> ) | MALMITO_3 (cyt. <i>b</i> ) | MALMITO_1 ( <i>coxIII</i> ) |
|---------------------------|--------------------------|----------------------------|----------------------------|-----------------------------|
| C2A+10xDSM1-1A            | 3                        | WT                         | WT                         | I239V                       |
| C2A+10x DSM1-2B           | 1                        | R265G                      | Y268S/WT                   | I239V                       |
| C2B+2xDSM-1A              | 2                        | WT                         | Y268S/WT                   | I239V                       |
| C2B+2xDSM1-1B             | 2                        | WT                         | Y268S/WT                   | I239V                       |
| C2B+2xDSM1-3B             | 1.5                      | WT                         | Y268S/WT                   | I239V                       |
| C2B+2xDSM1-2C             | 1                        | WT                         | Y268S/WT                   | I239V                       |

# Y268S heteroplasmy is responsible for combined atovaquone/DSM1 resistant phenotypes

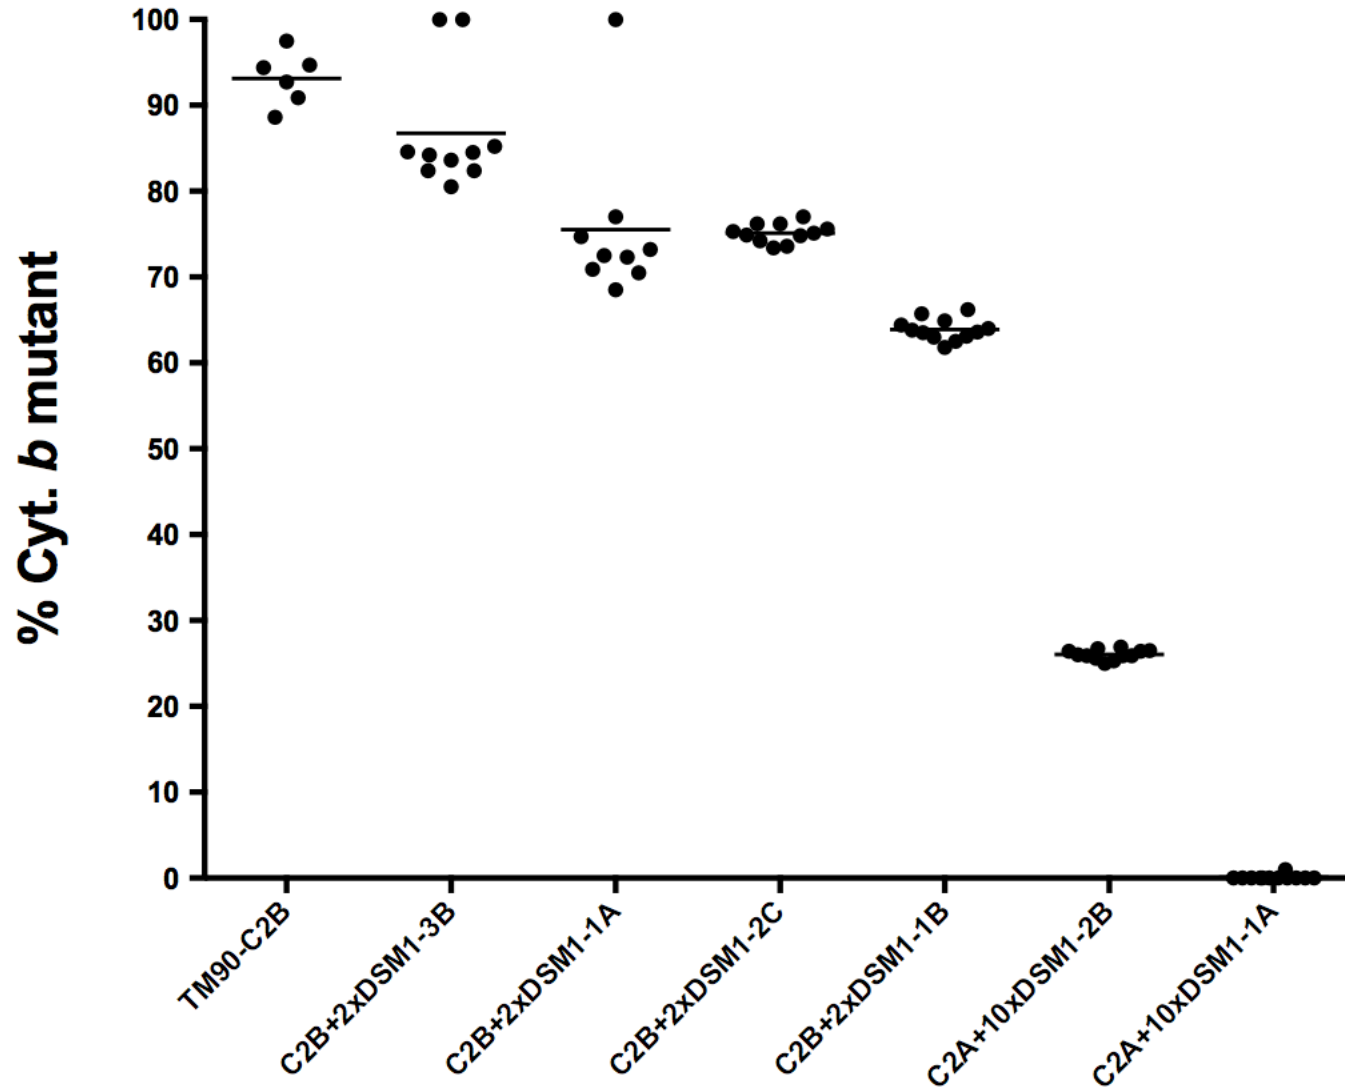

## Extended Data Figure 6

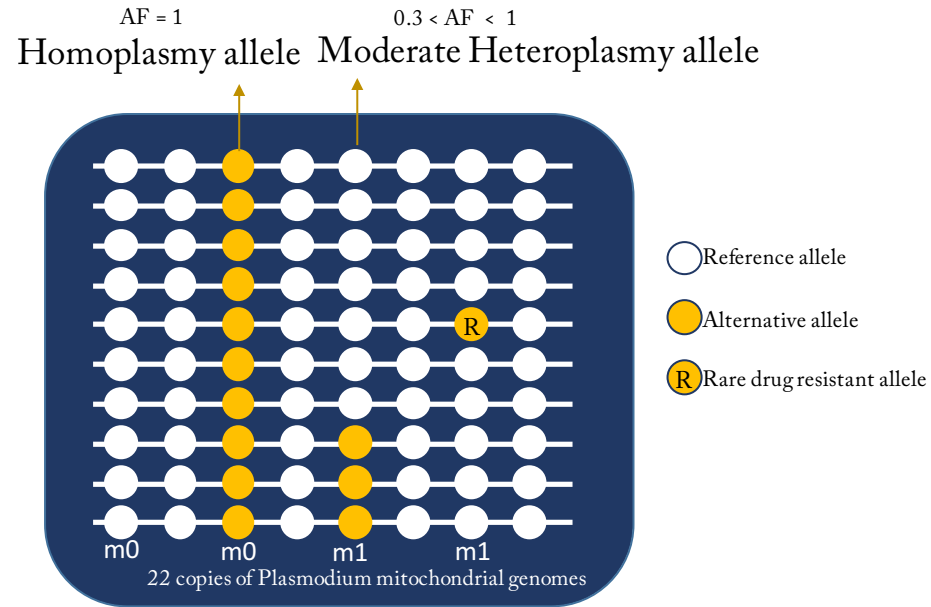

maximum likelihood estimation  $f_{m1}, f_{m0}$  can be calculated based on pre-classified potential heteroplasmy (m1) and homoplasmy (m0) data. The  $\log(L(f_{m1})/L(f_{m0}))$  was used for finding significant heteroplasmy site
